# Supplementary material for: BioCart© Opinion-based Study on Home Administration Support for Biological Therapies in Patients with Severe Asthma
Source: PubMed Central journal article supplement — Open Respir Arch. 2024 Nov 14;7(1):100375. doi: 10.1016/j.opresp.2024.100375 (PMC11663953; doi:10.1016/j.opresp.2024.100375), 2024-11-14
Supplement: mmc3.pdf [file mmc3.pdf]

CARTILLA

# bioCart

## Project BioCart<sup>©</sup>

Follow-up diary for the adult patient with severe asthma on home treatment with biologics

### OPINION STUDY IN REAL CLINICAL PRACTICE

*PRE and POST Questionnaires for Health Professionals*

February 2022

## Previous Note

This document includes two surveys to be completed by the health professionals participating in the project:

1. Survey prior to starting your experience of using the BioCart® (focused on expectations)
2. Post-use survey (focused on experience of use, not impact on clinical practice).

## Opinion survey for Healthcare Professionals PRE use of BioCart®

### INTRODUCTION

Dear participant:

First, we would like to thank you for agreeing to participate in this BioCart® continuity project. Your feedback is very valuable to us.

This project aims to **collect useful feedback to assess the use and usefulness of the BioCart® in the context of real clinical practice.**

This is the first questionnaire we will ask you to complete, and it will help us to **understand what your expectations are for using the BioCart® as a healthcare professional.**

We would like to inform you that:

- The survey is not related to any promotional material, and you will not be contacted for marketing purposes based on your survey responses.
- Neither the survey sponsor nor its suppliers will use the information outside the context of the project.
- Participation is anonymous. At no time will your answers be linked to the name of the respondent. The analysis of results will be carried out on an aggregate basis.

The survey should take you no more than **5 minutes** to complete, so please **read the questions below carefully** and **answer as honestly as possible.**

| DAILY CLINICAL PRACTICE                                                                                                                                                                                                                                                                                                                                                                                               |                                                                                                                                                                                                                                                                                                                                                                                                                                                                                                                                                                                                                                                                                                                                                                                                                                                                                                                                                                                                                                                                                                                                                                                                                                                                                                                                                                                                                                                                                                                                                                                                                                                                                                                                                                                                                                                                                                                                                                                                                                                                                                                                                                                                                                                                                                                                                                              |   |                                                                   |                                                                                                                                                     |                                  |                                                                                                                                     |                                  |                                                                                                                                            |  |                                                                                                                                                                                                         |  |                                                                                                                                               |  |                                                  |  |  |  |  |  |                                                                                                                                   |  |  |  |  |  |                                                           |  |  |  |  |  |                                                                           |  |  |  |  |  |                                                                              |  |  |  |  |  |                                                                                         |  |  |  |  |  |                                                                                    |  |  |  |  |  |                                                             |  |  |  |  |  |                                                              |  |  |  |  |  |                                                                                                                                                                                                                                                                                                                                                                       |  |  |  |  |  |                                                                                                                                  |  |  |  |  |  |
|-----------------------------------------------------------------------------------------------------------------------------------------------------------------------------------------------------------------------------------------------------------------------------------------------------------------------------------------------------------------------------------------------------------------------|------------------------------------------------------------------------------------------------------------------------------------------------------------------------------------------------------------------------------------------------------------------------------------------------------------------------------------------------------------------------------------------------------------------------------------------------------------------------------------------------------------------------------------------------------------------------------------------------------------------------------------------------------------------------------------------------------------------------------------------------------------------------------------------------------------------------------------------------------------------------------------------------------------------------------------------------------------------------------------------------------------------------------------------------------------------------------------------------------------------------------------------------------------------------------------------------------------------------------------------------------------------------------------------------------------------------------------------------------------------------------------------------------------------------------------------------------------------------------------------------------------------------------------------------------------------------------------------------------------------------------------------------------------------------------------------------------------------------------------------------------------------------------------------------------------------------------------------------------------------------------------------------------------------------------------------------------------------------------------------------------------------------------------------------------------------------------------------------------------------------------------------------------------------------------------------------------------------------------------------------------------------------------------------------------------------------------------------------------------------------------|---|-------------------------------------------------------------------|-----------------------------------------------------------------------------------------------------------------------------------------------------|----------------------------------|-------------------------------------------------------------------------------------------------------------------------------------|----------------------------------|--------------------------------------------------------------------------------------------------------------------------------------------|--|---------------------------------------------------------------------------------------------------------------------------------------------------------------------------------------------------------|--|-----------------------------------------------------------------------------------------------------------------------------------------------|--|--------------------------------------------------|--|--|--|--|--|-----------------------------------------------------------------------------------------------------------------------------------|--|--|--|--|--|-----------------------------------------------------------|--|--|--|--|--|---------------------------------------------------------------------------|--|--|--|--|--|------------------------------------------------------------------------------|--|--|--|--|--|-----------------------------------------------------------------------------------------|--|--|--|--|--|------------------------------------------------------------------------------------|--|--|--|--|--|-------------------------------------------------------------|--|--|--|--|--|--------------------------------------------------------------|--|--|--|--|--|-----------------------------------------------------------------------------------------------------------------------------------------------------------------------------------------------------------------------------------------------------------------------------------------------------------------------------------------------------------------------|--|--|--|--|--|----------------------------------------------------------------------------------------------------------------------------------|--|--|--|--|--|
| <p><b>1</b></p> <p>To begin with, we would like to know the reality of patients with severe asthma who start biologic therapy at home.</p> <p>Please indicate the percentage of patients who initiate in any of the following situations (if none, please indicate 0%) <i>(enter the % in each box. Must add up to 100%)</i></p>                                                                                      | <table border="1"> <thead> <tr> <th></th> <th>of total number of patients starting biological treatment at home</th> </tr> </thead> <tbody> <tr> <td>% of patients starting self-administered biological treatment at home after years (more than 12 months) of biological treatment in hospital setting</td> <td></td> </tr> <tr> <td>% of patients starting self-administered biologic treatment at home after 6-12 months of biologic treatment in the hospital setting</td> <td></td> </tr> <tr> <td>% of patients starting self-administered biologic treatment at home after less than 6 months of biologic treatment in the hospital setting</td> <td></td> </tr> <tr> <td>% of patients who directly initiate biological treatment on a self-administered basis at home after first administration education without going through the administration phase in a hospital setting</td> <td></td> </tr> <tr> <td>Other cases, specify and indicate % Other cases, specify and indicate % Other cases, specify and indicate % Other cases, specify and indicate</td> <td></td> </tr> </tbody> </table>                                                                                                                                                                                                                                                                                                                                                                                                                                                                                                                                                                                                                                                                                                                                                                                                                                                                                                                                                                                                                                                                                                                                                                                                                                                                 |   | of total number of patients starting biological treatment at home | % of patients starting self-administered biological treatment at home after years (more than 12 months) of biological treatment in hospital setting |                                  | % of patients starting self-administered biologic treatment at home after 6-12 months of biologic treatment in the hospital setting |                                  | % of patients starting self-administered biologic treatment at home after less than 6 months of biologic treatment in the hospital setting |  | % of patients who directly initiate biological treatment on a self-administered basis at home after first administration education without going through the administration phase in a hospital setting |  | Other cases, specify and indicate % Other cases, specify and indicate % Other cases, specify and indicate % Other cases, specify and indicate |  |                                                  |  |  |  |  |  |                                                                                                                                   |  |  |  |  |  |                                                           |  |  |  |  |  |                                                                           |  |  |  |  |  |                                                                              |  |  |  |  |  |                                                                                         |  |  |  |  |  |                                                                                    |  |  |  |  |  |                                                             |  |  |  |  |  |                                                              |  |  |  |  |  |                                                                                                                                                                                                                                                                                                                                                                       |  |  |  |  |  |                                                                                                                                  |  |  |  |  |  |
|                                                                                                                                                                                                                                                                                                                                                                                                                       | of total number of patients starting biological treatment at home                                                                                                                                                                                                                                                                                                                                                                                                                                                                                                                                                                                                                                                                                                                                                                                                                                                                                                                                                                                                                                                                                                                                                                                                                                                                                                                                                                                                                                                                                                                                                                                                                                                                                                                                                                                                                                                                                                                                                                                                                                                                                                                                                                                                                                                                                                            |   |                                                                   |                                                                                                                                                     |                                  |                                                                                                                                     |                                  |                                                                                                                                            |  |                                                                                                                                                                                                         |  |                                                                                                                                               |  |                                                  |  |  |  |  |  |                                                                                                                                   |  |  |  |  |  |                                                           |  |  |  |  |  |                                                                           |  |  |  |  |  |                                                                              |  |  |  |  |  |                                                                                         |  |  |  |  |  |                                                                                    |  |  |  |  |  |                                                             |  |  |  |  |  |                                                              |  |  |  |  |  |                                                                                                                                                                                                                                                                                                                                                                       |  |  |  |  |  |                                                                                                                                  |  |  |  |  |  |
| % of patients starting self-administered biological treatment at home after years (more than 12 months) of biological treatment in hospital setting                                                                                                                                                                                                                                                                   |                                                                                                                                                                                                                                                                                                                                                                                                                                                                                                                                                                                                                                                                                                                                                                                                                                                                                                                                                                                                                                                                                                                                                                                                                                                                                                                                                                                                                                                                                                                                                                                                                                                                                                                                                                                                                                                                                                                                                                                                                                                                                                                                                                                                                                                                                                                                                                              |   |                                                                   |                                                                                                                                                     |                                  |                                                                                                                                     |                                  |                                                                                                                                            |  |                                                                                                                                                                                                         |  |                                                                                                                                               |  |                                                  |  |  |  |  |  |                                                                                                                                   |  |  |  |  |  |                                                           |  |  |  |  |  |                                                                           |  |  |  |  |  |                                                                              |  |  |  |  |  |                                                                                         |  |  |  |  |  |                                                                                    |  |  |  |  |  |                                                             |  |  |  |  |  |                                                              |  |  |  |  |  |                                                                                                                                                                                                                                                                                                                                                                       |  |  |  |  |  |                                                                                                                                  |  |  |  |  |  |
| % of patients starting self-administered biologic treatment at home after 6-12 months of biologic treatment in the hospital setting                                                                                                                                                                                                                                                                                   |                                                                                                                                                                                                                                                                                                                                                                                                                                                                                                                                                                                                                                                                                                                                                                                                                                                                                                                                                                                                                                                                                                                                                                                                                                                                                                                                                                                                                                                                                                                                                                                                                                                                                                                                                                                                                                                                                                                                                                                                                                                                                                                                                                                                                                                                                                                                                                              |   |                                                                   |                                                                                                                                                     |                                  |                                                                                                                                     |                                  |                                                                                                                                            |  |                                                                                                                                                                                                         |  |                                                                                                                                               |  |                                                  |  |  |  |  |  |                                                                                                                                   |  |  |  |  |  |                                                           |  |  |  |  |  |                                                                           |  |  |  |  |  |                                                                              |  |  |  |  |  |                                                                                         |  |  |  |  |  |                                                                                    |  |  |  |  |  |                                                             |  |  |  |  |  |                                                              |  |  |  |  |  |                                                                                                                                                                                                                                                                                                                                                                       |  |  |  |  |  |                                                                                                                                  |  |  |  |  |  |
| % of patients starting self-administered biologic treatment at home after less than 6 months of biologic treatment in the hospital setting                                                                                                                                                                                                                                                                            |                                                                                                                                                                                                                                                                                                                                                                                                                                                                                                                                                                                                                                                                                                                                                                                                                                                                                                                                                                                                                                                                                                                                                                                                                                                                                                                                                                                                                                                                                                                                                                                                                                                                                                                                                                                                                                                                                                                                                                                                                                                                                                                                                                                                                                                                                                                                                                              |   |                                                                   |                                                                                                                                                     |                                  |                                                                                                                                     |                                  |                                                                                                                                            |  |                                                                                                                                                                                                         |  |                                                                                                                                               |  |                                                  |  |  |  |  |  |                                                                                                                                   |  |  |  |  |  |                                                           |  |  |  |  |  |                                                                           |  |  |  |  |  |                                                                              |  |  |  |  |  |                                                                                         |  |  |  |  |  |                                                                                    |  |  |  |  |  |                                                             |  |  |  |  |  |                                                              |  |  |  |  |  |                                                                                                                                                                                                                                                                                                                                                                       |  |  |  |  |  |                                                                                                                                  |  |  |  |  |  |
| % of patients who directly initiate biological treatment on a self-administered basis at home after first administration education without going through the administration phase in a hospital setting                                                                                                                                                                                                               |                                                                                                                                                                                                                                                                                                                                                                                                                                                                                                                                                                                                                                                                                                                                                                                                                                                                                                                                                                                                                                                                                                                                                                                                                                                                                                                                                                                                                                                                                                                                                                                                                                                                                                                                                                                                                                                                                                                                                                                                                                                                                                                                                                                                                                                                                                                                                                              |   |                                                                   |                                                                                                                                                     |                                  |                                                                                                                                     |                                  |                                                                                                                                            |  |                                                                                                                                                                                                         |  |                                                                                                                                               |  |                                                  |  |  |  |  |  |                                                                                                                                   |  |  |  |  |  |                                                           |  |  |  |  |  |                                                                           |  |  |  |  |  |                                                                              |  |  |  |  |  |                                                                                         |  |  |  |  |  |                                                                                    |  |  |  |  |  |                                                             |  |  |  |  |  |                                                              |  |  |  |  |  |                                                                                                                                                                                                                                                                                                                                                                       |  |  |  |  |  |                                                                                                                                  |  |  |  |  |  |
| Other cases, specify and indicate % Other cases, specify and indicate % Other cases, specify and indicate % Other cases, specify and indicate                                                                                                                                                                                                                                                                         |                                                                                                                                                                                                                                                                                                                                                                                                                                                                                                                                                                                                                                                                                                                                                                                                                                                                                                                                                                                                                                                                                                                                                                                                                                                                                                                                                                                                                                                                                                                                                                                                                                                                                                                                                                                                                                                                                                                                                                                                                                                                                                                                                                                                                                                                                                                                                                              |   |                                                                   |                                                                                                                                                     |                                  |                                                                                                                                     |                                  |                                                                                                                                            |  |                                                                                                                                                                                                         |  |                                                                                                                                               |  |                                                  |  |  |  |  |  |                                                                                                                                   |  |  |  |  |  |                                                           |  |  |  |  |  |                                                                           |  |  |  |  |  |                                                                              |  |  |  |  |  |                                                                                         |  |  |  |  |  |                                                                                    |  |  |  |  |  |                                                             |  |  |  |  |  |                                                              |  |  |  |  |  |                                                                                                                                                                                                                                                                                                                                                                       |  |  |  |  |  |                                                                                                                                  |  |  |  |  |  |
| <p><b>2</b></p> <p>Below are several statements related to possible situations that could pose a problem in the management of patients with severe asthma on home treatment with biologics.</p> <p>Please read them carefully and rate them from 1 to 5 according to your opinion, where <b>1 IS NOT A PROBLEM</b> and <b>5 IS A VERY COMMON PROBLEM</b> <i>(please tick only one answer for each statement)</i>.</p> | <table border="1"> <thead> <tr> <th></th> <th>1<br/>IS NOT A<br/>PROBLEM</th> <th>2</th> <th>3</th> <th>4</th> <th>5<br/>IS A VERY COMMON<br/>PROBLEM</th> </tr> </thead> <tbody> <tr> <td>The patient's failure to follow the instructions given by the health professional</td> <td></td> <td></td> <td></td> <td></td> <td></td> </tr> <tr> <td>Non-adherence to prescribed biological treatment</td> <td></td> <td></td> <td></td> <td></td> <td></td> </tr> <tr> <td>Lack of persistence to the prescribed biological treatment (time during which the patient complies with the agreed prescription).</td> <td></td> <td></td> <td></td> <td></td> <td></td> </tr> <tr> <td>The patient's low awareness of their biological treatment</td> <td></td> <td></td> <td></td> <td></td> <td></td> </tr> <tr> <td>Poor patient knowledge of how to store and transport biological treatment</td> <td></td> <td></td> <td></td> <td></td> <td></td> </tr> <tr> <td>Incorrect self-administration of biological treatment at home by the patient</td> <td></td> <td></td> <td></td> <td></td> <td></td> </tr> <tr> <td>Poor patient knowledge of the instructions for self-administration of the biologic drug</td> <td></td> <td></td> <td></td> <td></td> <td></td> </tr> <tr> <td>Possible errors leading to a lack of therapeutic adherence to biological treatment</td> <td></td> <td></td> <td></td> <td></td> <td></td> </tr> <tr> <td>Lack of knowledge to identify asthma attacks by the patient</td> <td></td> <td></td> <td></td> <td></td> <td></td> </tr> <tr> <td>Poor control and management of asthma attacks by the patient</td> <td></td> <td></td> <td></td> <td></td> <td></td> </tr> <tr> <td>The patient does not remember, in the consultation, all the information that the health professional asks him/her (e.g. how many crises he/she has suffered in the inter-consultation period, if he/she has visited the emergency department, if he/she has been prescribed a course of antibiotics, adverse effects after the administration of the biologic, etc.).</td> <td></td> <td></td> <td></td> <td></td> <td></td> </tr> <tr> <td>The patient does not remember, in consultation, the additional information he/she wants to discuss with the health professional.</td> <td></td> <td></td> <td></td> <td></td> <td></td> </tr> </tbody> </table> |   | 1<br>IS NOT A<br>PROBLEM                                          | 2                                                                                                                                                   | 3                                | 4                                                                                                                                   | 5<br>IS A VERY COMMON<br>PROBLEM | The patient's failure to follow the instructions given by the health professional                                                          |  |                                                                                                                                                                                                         |  |                                                                                                                                               |  | Non-adherence to prescribed biological treatment |  |  |  |  |  | Lack of persistence to the prescribed biological treatment (time during which the patient complies with the agreed prescription). |  |  |  |  |  | The patient's low awareness of their biological treatment |  |  |  |  |  | Poor patient knowledge of how to store and transport biological treatment |  |  |  |  |  | Incorrect self-administration of biological treatment at home by the patient |  |  |  |  |  | Poor patient knowledge of the instructions for self-administration of the biologic drug |  |  |  |  |  | Possible errors leading to a lack of therapeutic adherence to biological treatment |  |  |  |  |  | Lack of knowledge to identify asthma attacks by the patient |  |  |  |  |  | Poor control and management of asthma attacks by the patient |  |  |  |  |  | The patient does not remember, in the consultation, all the information that the health professional asks him/her (e.g. how many crises he/she has suffered in the inter-consultation period, if he/she has visited the emergency department, if he/she has been prescribed a course of antibiotics, adverse effects after the administration of the biologic, etc.). |  |  |  |  |  | The patient does not remember, in consultation, the additional information he/she wants to discuss with the health professional. |  |  |  |  |  |
|                                                                                                                                                                                                                                                                                                                                                                                                                       | 1<br>IS NOT A<br>PROBLEM                                                                                                                                                                                                                                                                                                                                                                                                                                                                                                                                                                                                                                                                                                                                                                                                                                                                                                                                                                                                                                                                                                                                                                                                                                                                                                                                                                                                                                                                                                                                                                                                                                                                                                                                                                                                                                                                                                                                                                                                                                                                                                                                                                                                                                                                                                                                                     | 2 | 3                                                                 | 4                                                                                                                                                   | 5<br>IS A VERY COMMON<br>PROBLEM |                                                                                                                                     |                                  |                                                                                                                                            |  |                                                                                                                                                                                                         |  |                                                                                                                                               |  |                                                  |  |  |  |  |  |                                                                                                                                   |  |  |  |  |  |                                                           |  |  |  |  |  |                                                                           |  |  |  |  |  |                                                                              |  |  |  |  |  |                                                                                         |  |  |  |  |  |                                                                                    |  |  |  |  |  |                                                             |  |  |  |  |  |                                                              |  |  |  |  |  |                                                                                                                                                                                                                                                                                                                                                                       |  |  |  |  |  |                                                                                                                                  |  |  |  |  |  |
| The patient's failure to follow the instructions given by the health professional                                                                                                                                                                                                                                                                                                                                     |                                                                                                                                                                                                                                                                                                                                                                                                                                                                                                                                                                                                                                                                                                                                                                                                                                                                                                                                                                                                                                                                                                                                                                                                                                                                                                                                                                                                                                                                                                                                                                                                                                                                                                                                                                                                                                                                                                                                                                                                                                                                                                                                                                                                                                                                                                                                                                              |   |                                                                   |                                                                                                                                                     |                                  |                                                                                                                                     |                                  |                                                                                                                                            |  |                                                                                                                                                                                                         |  |                                                                                                                                               |  |                                                  |  |  |  |  |  |                                                                                                                                   |  |  |  |  |  |                                                           |  |  |  |  |  |                                                                           |  |  |  |  |  |                                                                              |  |  |  |  |  |                                                                                         |  |  |  |  |  |                                                                                    |  |  |  |  |  |                                                             |  |  |  |  |  |                                                              |  |  |  |  |  |                                                                                                                                                                                                                                                                                                                                                                       |  |  |  |  |  |                                                                                                                                  |  |  |  |  |  |
| Non-adherence to prescribed biological treatment                                                                                                                                                                                                                                                                                                                                                                      |                                                                                                                                                                                                                                                                                                                                                                                                                                                                                                                                                                                                                                                                                                                                                                                                                                                                                                                                                                                                                                                                                                                                                                                                                                                                                                                                                                                                                                                                                                                                                                                                                                                                                                                                                                                                                                                                                                                                                                                                                                                                                                                                                                                                                                                                                                                                                                              |   |                                                                   |                                                                                                                                                     |                                  |                                                                                                                                     |                                  |                                                                                                                                            |  |                                                                                                                                                                                                         |  |                                                                                                                                               |  |                                                  |  |  |  |  |  |                                                                                                                                   |  |  |  |  |  |                                                           |  |  |  |  |  |                                                                           |  |  |  |  |  |                                                                              |  |  |  |  |  |                                                                                         |  |  |  |  |  |                                                                                    |  |  |  |  |  |                                                             |  |  |  |  |  |                                                              |  |  |  |  |  |                                                                                                                                                                                                                                                                                                                                                                       |  |  |  |  |  |                                                                                                                                  |  |  |  |  |  |
| Lack of persistence to the prescribed biological treatment (time during which the patient complies with the agreed prescription).                                                                                                                                                                                                                                                                                     |                                                                                                                                                                                                                                                                                                                                                                                                                                                                                                                                                                                                                                                                                                                                                                                                                                                                                                                                                                                                                                                                                                                                                                                                                                                                                                                                                                                                                                                                                                                                                                                                                                                                                                                                                                                                                                                                                                                                                                                                                                                                                                                                                                                                                                                                                                                                                                              |   |                                                                   |                                                                                                                                                     |                                  |                                                                                                                                     |                                  |                                                                                                                                            |  |                                                                                                                                                                                                         |  |                                                                                                                                               |  |                                                  |  |  |  |  |  |                                                                                                                                   |  |  |  |  |  |                                                           |  |  |  |  |  |                                                                           |  |  |  |  |  |                                                                              |  |  |  |  |  |                                                                                         |  |  |  |  |  |                                                                                    |  |  |  |  |  |                                                             |  |  |  |  |  |                                                              |  |  |  |  |  |                                                                                                                                                                                                                                                                                                                                                                       |  |  |  |  |  |                                                                                                                                  |  |  |  |  |  |
| The patient's low awareness of their biological treatment                                                                                                                                                                                                                                                                                                                                                             |                                                                                                                                                                                                                                                                                                                                                                                                                                                                                                                                                                                                                                                                                                                                                                                                                                                                                                                                                                                                                                                                                                                                                                                                                                                                                                                                                                                                                                                                                                                                                                                                                                                                                                                                                                                                                                                                                                                                                                                                                                                                                                                                                                                                                                                                                                                                                                              |   |                                                                   |                                                                                                                                                     |                                  |                                                                                                                                     |                                  |                                                                                                                                            |  |                                                                                                                                                                                                         |  |                                                                                                                                               |  |                                                  |  |  |  |  |  |                                                                                                                                   |  |  |  |  |  |                                                           |  |  |  |  |  |                                                                           |  |  |  |  |  |                                                                              |  |  |  |  |  |                                                                                         |  |  |  |  |  |                                                                                    |  |  |  |  |  |                                                             |  |  |  |  |  |                                                              |  |  |  |  |  |                                                                                                                                                                                                                                                                                                                                                                       |  |  |  |  |  |                                                                                                                                  |  |  |  |  |  |
| Poor patient knowledge of how to store and transport biological treatment                                                                                                                                                                                                                                                                                                                                             |                                                                                                                                                                                                                                                                                                                                                                                                                                                                                                                                                                                                                                                                                                                                                                                                                                                                                                                                                                                                                                                                                                                                                                                                                                                                                                                                                                                                                                                                                                                                                                                                                                                                                                                                                                                                                                                                                                                                                                                                                                                                                                                                                                                                                                                                                                                                                                              |   |                                                                   |                                                                                                                                                     |                                  |                                                                                                                                     |                                  |                                                                                                                                            |  |                                                                                                                                                                                                         |  |                                                                                                                                               |  |                                                  |  |  |  |  |  |                                                                                                                                   |  |  |  |  |  |                                                           |  |  |  |  |  |                                                                           |  |  |  |  |  |                                                                              |  |  |  |  |  |                                                                                         |  |  |  |  |  |                                                                                    |  |  |  |  |  |                                                             |  |  |  |  |  |                                                              |  |  |  |  |  |                                                                                                                                                                                                                                                                                                                                                                       |  |  |  |  |  |                                                                                                                                  |  |  |  |  |  |
| Incorrect self-administration of biological treatment at home by the patient                                                                                                                                                                                                                                                                                                                                          |                                                                                                                                                                                                                                                                                                                                                                                                                                                                                                                                                                                                                                                                                                                                                                                                                                                                                                                                                                                                                                                                                                                                                                                                                                                                                                                                                                                                                                                                                                                                                                                                                                                                                                                                                                                                                                                                                                                                                                                                                                                                                                                                                                                                                                                                                                                                                                              |   |                                                                   |                                                                                                                                                     |                                  |                                                                                                                                     |                                  |                                                                                                                                            |  |                                                                                                                                                                                                         |  |                                                                                                                                               |  |                                                  |  |  |  |  |  |                                                                                                                                   |  |  |  |  |  |                                                           |  |  |  |  |  |                                                                           |  |  |  |  |  |                                                                              |  |  |  |  |  |                                                                                         |  |  |  |  |  |                                                                                    |  |  |  |  |  |                                                             |  |  |  |  |  |                                                              |  |  |  |  |  |                                                                                                                                                                                                                                                                                                                                                                       |  |  |  |  |  |                                                                                                                                  |  |  |  |  |  |
| Poor patient knowledge of the instructions for self-administration of the biologic drug                                                                                                                                                                                                                                                                                                                               |                                                                                                                                                                                                                                                                                                                                                                                                                                                                                                                                                                                                                                                                                                                                                                                                                                                                                                                                                                                                                                                                                                                                                                                                                                                                                                                                                                                                                                                                                                                                                                                                                                                                                                                                                                                                                                                                                                                                                                                                                                                                                                                                                                                                                                                                                                                                                                              |   |                                                                   |                                                                                                                                                     |                                  |                                                                                                                                     |                                  |                                                                                                                                            |  |                                                                                                                                                                                                         |  |                                                                                                                                               |  |                                                  |  |  |  |  |  |                                                                                                                                   |  |  |  |  |  |                                                           |  |  |  |  |  |                                                                           |  |  |  |  |  |                                                                              |  |  |  |  |  |                                                                                         |  |  |  |  |  |                                                                                    |  |  |  |  |  |                                                             |  |  |  |  |  |                                                              |  |  |  |  |  |                                                                                                                                                                                                                                                                                                                                                                       |  |  |  |  |  |                                                                                                                                  |  |  |  |  |  |
| Possible errors leading to a lack of therapeutic adherence to biological treatment                                                                                                                                                                                                                                                                                                                                    |                                                                                                                                                                                                                                                                                                                                                                                                                                                                                                                                                                                                                                                                                                                                                                                                                                                                                                                                                                                                                                                                                                                                                                                                                                                                                                                                                                                                                                                                                                                                                                                                                                                                                                                                                                                                                                                                                                                                                                                                                                                                                                                                                                                                                                                                                                                                                                              |   |                                                                   |                                                                                                                                                     |                                  |                                                                                                                                     |                                  |                                                                                                                                            |  |                                                                                                                                                                                                         |  |                                                                                                                                               |  |                                                  |  |  |  |  |  |                                                                                                                                   |  |  |  |  |  |                                                           |  |  |  |  |  |                                                                           |  |  |  |  |  |                                                                              |  |  |  |  |  |                                                                                         |  |  |  |  |  |                                                                                    |  |  |  |  |  |                                                             |  |  |  |  |  |                                                              |  |  |  |  |  |                                                                                                                                                                                                                                                                                                                                                                       |  |  |  |  |  |                                                                                                                                  |  |  |  |  |  |
| Lack of knowledge to identify asthma attacks by the patient                                                                                                                                                                                                                                                                                                                                                           |                                                                                                                                                                                                                                                                                                                                                                                                                                                                                                                                                                                                                                                                                                                                                                                                                                                                                                                                                                                                                                                                                                                                                                                                                                                                                                                                                                                                                                                                                                                                                                                                                                                                                                                                                                                                                                                                                                                                                                                                                                                                                                                                                                                                                                                                                                                                                                              |   |                                                                   |                                                                                                                                                     |                                  |                                                                                                                                     |                                  |                                                                                                                                            |  |                                                                                                                                                                                                         |  |                                                                                                                                               |  |                                                  |  |  |  |  |  |                                                                                                                                   |  |  |  |  |  |                                                           |  |  |  |  |  |                                                                           |  |  |  |  |  |                                                                              |  |  |  |  |  |                                                                                         |  |  |  |  |  |                                                                                    |  |  |  |  |  |                                                             |  |  |  |  |  |                                                              |  |  |  |  |  |                                                                                                                                                                                                                                                                                                                                                                       |  |  |  |  |  |                                                                                                                                  |  |  |  |  |  |
| Poor control and management of asthma attacks by the patient                                                                                                                                                                                                                                                                                                                                                          |                                                                                                                                                                                                                                                                                                                                                                                                                                                                                                                                                                                                                                                                                                                                                                                                                                                                                                                                                                                                                                                                                                                                                                                                                                                                                                                                                                                                                                                                                                                                                                                                                                                                                                                                                                                                                                                                                                                                                                                                                                                                                                                                                                                                                                                                                                                                                                              |   |                                                                   |                                                                                                                                                     |                                  |                                                                                                                                     |                                  |                                                                                                                                            |  |                                                                                                                                                                                                         |  |                                                                                                                                               |  |                                                  |  |  |  |  |  |                                                                                                                                   |  |  |  |  |  |                                                           |  |  |  |  |  |                                                                           |  |  |  |  |  |                                                                              |  |  |  |  |  |                                                                                         |  |  |  |  |  |                                                                                    |  |  |  |  |  |                                                             |  |  |  |  |  |                                                              |  |  |  |  |  |                                                                                                                                                                                                                                                                                                                                                                       |  |  |  |  |  |                                                                                                                                  |  |  |  |  |  |
| The patient does not remember, in the consultation, all the information that the health professional asks him/her (e.g. how many crises he/she has suffered in the inter-consultation period, if he/she has visited the emergency department, if he/she has been prescribed a course of antibiotics, adverse effects after the administration of the biologic, etc.).                                                 |                                                                                                                                                                                                                                                                                                                                                                                                                                                                                                                                                                                                                                                                                                                                                                                                                                                                                                                                                                                                                                                                                                                                                                                                                                                                                                                                                                                                                                                                                                                                                                                                                                                                                                                                                                                                                                                                                                                                                                                                                                                                                                                                                                                                                                                                                                                                                                              |   |                                                                   |                                                                                                                                                     |                                  |                                                                                                                                     |                                  |                                                                                                                                            |  |                                                                                                                                                                                                         |  |                                                                                                                                               |  |                                                  |  |  |  |  |  |                                                                                                                                   |  |  |  |  |  |                                                           |  |  |  |  |  |                                                                           |  |  |  |  |  |                                                                              |  |  |  |  |  |                                                                                         |  |  |  |  |  |                                                                                    |  |  |  |  |  |                                                             |  |  |  |  |  |                                                              |  |  |  |  |  |                                                                                                                                                                                                                                                                                                                                                                       |  |  |  |  |  |                                                                                                                                  |  |  |  |  |  |
| The patient does not remember, in consultation, the additional information he/she wants to discuss with the health professional.                                                                                                                                                                                                                                                                                      |                                                                                                                                                                                                                                                                                                                                                                                                                                                                                                                                                                                                                                                                                                                                                                                                                                                                                                                                                                                                                                                                                                                                                                                                                                                                                                                                                                                                                                                                                                                                                                                                                                                                                                                                                                                                                                                                                                                                                                                                                                                                                                                                                                                                                                                                                                                                                                              |   |                                                                   |                                                                                                                                                     |                                  |                                                                                                                                     |                                  |                                                                                                                                            |  |                                                                                                                                                                                                         |  |                                                                                                                                               |  |                                                  |  |  |  |  |  |                                                                                                                                   |  |  |  |  |  |                                                           |  |  |  |  |  |                                                                           |  |  |  |  |  |                                                                              |  |  |  |  |  |                                                                                         |  |  |  |  |  |                                                                                    |  |  |  |  |  |                                                             |  |  |  |  |  |                                                              |  |  |  |  |  |                                                                                                                                                                                                                                                                                                                                                                       |  |  |  |  |  |                                                                                                                                  |  |  |  |  |  |

|                                                                                                               |                                                                                                                                                                                                                                                                                                                                                                                                                                                                                                                                                                                                                                                                                     |
|---------------------------------------------------------------------------------------------------------------|-------------------------------------------------------------------------------------------------------------------------------------------------------------------------------------------------------------------------------------------------------------------------------------------------------------------------------------------------------------------------------------------------------------------------------------------------------------------------------------------------------------------------------------------------------------------------------------------------------------------------------------------------------------------------------------|
| <b>3</b>                                                                                                      | <p>We would like to know if the hospital provides any support material for patients with severe asthma on self-administered biologic therapy <i>(please tick ONLY one answer)</i></p> <ul style="list-style-type: none"> <li><input type="radio"/> Yes</li> <li><input type="radio"/> No</li> </ul>                                                                                                                                                                                                                                                                                                                                                                                 |
| <p>[Questions Q5, Q6 and Q7 are only for those who have answered YES in Q4. The rest skip to question Q8]</p> |                                                                                                                                                                                                                                                                                                                                                                                                                                                                                                                                                                                                                                                                                     |
| <b>4</b>                                                                                                      | <p>You have replied that patients are given support material. Which health professionals deliver this material <i>(tick all that apply)?</i></p> <ul style="list-style-type: none"> <li><input type="checkbox"/> Allergist</li> <li><input type="checkbox"/> Nursing</li> <li><input type="checkbox"/> Hospital Pharmacy</li> <li><input type="checkbox"/> Pneumologist</li> <li><input type="checkbox"/> Other/s. Please specify: _____</li> </ul>                                                                                                                                                                                                                                 |
| <b>5</b>                                                                                                      | <p>You have replied that patients with severe asthma and on home biological therapy are given support material. Can you tell us when it is delivered and what type of material <i>(please tick all that apply)?</i></p> <ul style="list-style-type: none"> <li><input type="checkbox"/> Information material at the time of diagnosis</li> <li><input type="checkbox"/> Information material when starting biologic therapy</li> <li><input type="checkbox"/> Information material at the time of initiation of home biological therapy</li> <li><input type="checkbox"/> Section for adhesion monitoring</li> <li><input type="checkbox"/> Other. Please specify: _____</li> </ul> |
| <b>6</b>                                                                                                      | <p>In addition to physical or digital material, do you have any other support systems available for these patients with severe asthma <i>(tick all that apply)?</i></p> <ul style="list-style-type: none"> <li><input type="checkbox"/> Contact telephone number from the unit or from the hospital pharmacy</li> <li><input type="checkbox"/> E-mail handled from the unit or from hospital pharmacy</li> <li><input type="checkbox"/> Other/s. Please specify: _____</li> <li><input type="checkbox"/> No additional support systems</li> </ul>                                                                                                                                   |

| EXPECTATIONS WITH THE BIOCART® DIARY                                                          |                                                                                                                                                                                                                                                                                                                                                                                                                                                                                                                                                                                                                                                                                                                                                                                                                                                                                                                                                                                                                                                                                                                                                                                                                                                                                                                                                                                                                                                                                                                             |                                             |                          |   |                        |   |                        |                                                                      |  |  |  |  |  |                                                                      |  |  |  |  |  |                                                                                               |  |  |  |  |  |                                                                                       |  |  |  |  |  |                                                                           |  |  |  |  |  |                                                                                      |  |  |  |  |  |                                                         |  |  |  |  |  |  |  |  |  |
|-----------------------------------------------------------------------------------------------|-----------------------------------------------------------------------------------------------------------------------------------------------------------------------------------------------------------------------------------------------------------------------------------------------------------------------------------------------------------------------------------------------------------------------------------------------------------------------------------------------------------------------------------------------------------------------------------------------------------------------------------------------------------------------------------------------------------------------------------------------------------------------------------------------------------------------------------------------------------------------------------------------------------------------------------------------------------------------------------------------------------------------------------------------------------------------------------------------------------------------------------------------------------------------------------------------------------------------------------------------------------------------------------------------------------------------------------------------------------------------------------------------------------------------------------------------------------------------------------------------------------------------------|---------------------------------------------|--------------------------|---|------------------------|---|------------------------|----------------------------------------------------------------------|--|--|--|--|--|----------------------------------------------------------------------|--|--|--|--|--|-----------------------------------------------------------------------------------------------|--|--|--|--|--|---------------------------------------------------------------------------------------|--|--|--|--|--|---------------------------------------------------------------------------|--|--|--|--|--|--------------------------------------------------------------------------------------|--|--|--|--|--|---------------------------------------------------------|--|--|--|--|--|--|--|--|--|
| 7.                                                                                            | <p>We would now like to focus on the BioCart® Diary.<br/>To begin with, we would like to hear your first impressions of the BioCart® Diary before you use it.</p> <p>Read each of the statements carefully and indicate your level of agreement with each statement, where <b>1 NOT AT ALL AGREE</b> and <b>5 STRONGLY AGREE</b> (<i>please tick only one answer for each statement</i>).</p> <table border="1"> <thead> <tr> <th>The BioCart® Diary looks like a material...</th> <th>1<br/>NOT AT<br/>ALL AGREE</th> <th>2</th> <th>3</th> <th>4</th> <th>5<br/>STRONGLY<br/>AGREE</th> </tr> </thead> <tbody> <tr> <td>...easy to use for the healthcare professional</td> <td></td> <td></td> <td></td> <td></td> <td></td> </tr> <tr> <td>...easy to explain to the patient</td> <td></td> <td></td> <td></td> <td></td> <td></td> </tr> <tr> <td>...easy for the patient to understand</td> <td></td> <td></td> <td></td> <td></td> <td></td> </tr> <tr> <td>...easy to fill in by the patient</td> <td></td> <td></td> <td></td> <td></td> <td></td> </tr> <tr> <td>...easy to analyse (once filled in) by the healthcare professional</td> <td></td> <td></td> <td></td> <td></td> <td></td> </tr> </tbody> </table>                                                                                                                                                                                                                                                                                                | The BioCart® Diary looks like a material... | 1<br>NOT AT<br>ALL AGREE | 2 | 3                      | 4 | 5<br>STRONGLY<br>AGREE | ...easy to use for the healthcare professional                       |  |  |  |  |  | ...easy to explain to the patient                                    |  |  |  |  |  | ...easy for the patient to understand                                                         |  |  |  |  |  | ...easy to fill in by the patient                                                     |  |  |  |  |  | ...easy to analyse (once filled in) by the healthcare professional        |  |  |  |  |  |                                                                                      |  |  |  |  |  |                                                         |  |  |  |  |  |  |  |  |  |
| The BioCart® Diary looks like a material...                                                   | 1<br>NOT AT<br>ALL AGREE                                                                                                                                                                                                                                                                                                                                                                                                                                                                                                                                                                                                                                                                                                                                                                                                                                                                                                                                                                                                                                                                                                                                                                                                                                                                                                                                                                                                                                                                                                    | 2                                           | 3                        | 4 | 5<br>STRONGLY<br>AGREE |   |                        |                                                                      |  |  |  |  |  |                                                                      |  |  |  |  |  |                                                                                               |  |  |  |  |  |                                                                                       |  |  |  |  |  |                                                                           |  |  |  |  |  |                                                                                      |  |  |  |  |  |                                                         |  |  |  |  |  |  |  |  |  |
| ...easy to use for the healthcare professional                                                |                                                                                                                                                                                                                                                                                                                                                                                                                                                                                                                                                                                                                                                                                                                                                                                                                                                                                                                                                                                                                                                                                                                                                                                                                                                                                                                                                                                                                                                                                                                             |                                             |                          |   |                        |   |                        |                                                                      |  |  |  |  |  |                                                                      |  |  |  |  |  |                                                                                               |  |  |  |  |  |                                                                                       |  |  |  |  |  |                                                                           |  |  |  |  |  |                                                                                      |  |  |  |  |  |                                                         |  |  |  |  |  |  |  |  |  |
| ...easy to explain to the patient                                                             |                                                                                                                                                                                                                                                                                                                                                                                                                                                                                                                                                                                                                                                                                                                                                                                                                                                                                                                                                                                                                                                                                                                                                                                                                                                                                                                                                                                                                                                                                                                             |                                             |                          |   |                        |   |                        |                                                                      |  |  |  |  |  |                                                                      |  |  |  |  |  |                                                                                               |  |  |  |  |  |                                                                                       |  |  |  |  |  |                                                                           |  |  |  |  |  |                                                                                      |  |  |  |  |  |                                                         |  |  |  |  |  |  |  |  |  |
| ...easy for the patient to understand                                                         |                                                                                                                                                                                                                                                                                                                                                                                                                                                                                                                                                                                                                                                                                                                                                                                                                                                                                                                                                                                                                                                                                                                                                                                                                                                                                                                                                                                                                                                                                                                             |                                             |                          |   |                        |   |                        |                                                                      |  |  |  |  |  |                                                                      |  |  |  |  |  |                                                                                               |  |  |  |  |  |                                                                                       |  |  |  |  |  |                                                                           |  |  |  |  |  |                                                                                      |  |  |  |  |  |                                                         |  |  |  |  |  |  |  |  |  |
| ...easy to fill in by the patient                                                             |                                                                                                                                                                                                                                                                                                                                                                                                                                                                                                                                                                                                                                                                                                                                                                                                                                                                                                                                                                                                                                                                                                                                                                                                                                                                                                                                                                                                                                                                                                                             |                                             |                          |   |                        |   |                        |                                                                      |  |  |  |  |  |                                                                      |  |  |  |  |  |                                                                                               |  |  |  |  |  |                                                                                       |  |  |  |  |  |                                                                           |  |  |  |  |  |                                                                                      |  |  |  |  |  |                                                         |  |  |  |  |  |  |  |  |  |
| ...easy to analyse (once filled in) by the healthcare professional                            |                                                                                                                                                                                                                                                                                                                                                                                                                                                                                                                                                                                                                                                                                                                                                                                                                                                                                                                                                                                                                                                                                                                                                                                                                                                                                                                                                                                                                                                                                                                             |                                             |                          |   |                        |   |                        |                                                                      |  |  |  |  |  |                                                                      |  |  |  |  |  |                                                                                               |  |  |  |  |  |                                                                                       |  |  |  |  |  |                                                                           |  |  |  |  |  |                                                                                      |  |  |  |  |  |                                                         |  |  |  |  |  |  |  |  |  |
| 8.                                                                                            | <p>For use in clinical practice, please indicate what you envisage using the BioCart® Diary for.</p> <p>Read each of the statements carefully and indicate your degree of agreement with each of them, where <b>1 is NEVER</b> and <b>5 is HABITUALLY</b> (<i>mark only one answer for each statement</i>).</p> <table border="1"> <thead> <tr> <th></th> <th>1<br/>NEVER</th> <th>2</th> <th>3</th> <th>4</th> <th>5<br/>HABITUALLY</th> </tr> </thead> <tbody> <tr> <td>To train my patients in the correct administration of biologic drugs</td> <td></td> <td></td> <td></td> <td></td> <td></td> </tr> <tr> <td>To monitor the disease progression of my patients with severe asthma</td> <td></td> <td></td> <td></td> <td></td> <td></td> </tr> <tr> <td>To have a better prevention of recurrence of asthma attacks in my patients with severe asthma</td> <td></td> <td></td> <td></td> <td></td> <td></td> </tr> <tr> <td>To assess therapeutic adherence to biologic therapy in my patients with severe asthma</td> <td></td> <td></td> <td></td> <td></td> <td></td> </tr> <tr> <td>To improve adverse event reporting following biologic drug administration</td> <td></td> <td></td> <td></td> <td></td> <td></td> </tr> <tr> <td>To make therapeutic decisions regarding the management of my patients</td> <td></td> <td></td> <td></td> <td></td> <td></td> </tr> </tbody> </table>                                                                                                                        |                                             | 1<br>NEVER               | 2 | 3                      | 4 | 5<br>HABITUALLY        | To train my patients in the correct administration of biologic drugs |  |  |  |  |  | To monitor the disease progression of my patients with severe asthma |  |  |  |  |  | To have a better prevention of recurrence of asthma attacks in my patients with severe asthma |  |  |  |  |  | To assess therapeutic adherence to biologic therapy in my patients with severe asthma |  |  |  |  |  | To improve adverse event reporting following biologic drug administration |  |  |  |  |  | To make therapeutic decisions regarding the management of my patients                |  |  |  |  |  |                                                         |  |  |  |  |  |  |  |  |  |
|                                                                                               | 1<br>NEVER                                                                                                                                                                                                                                                                                                                                                                                                                                                                                                                                                                                                                                                                                                                                                                                                                                                                                                                                                                                                                                                                                                                                                                                                                                                                                                                                                                                                                                                                                                                  | 2                                           | 3                        | 4 | 5<br>HABITUALLY        |   |                        |                                                                      |  |  |  |  |  |                                                                      |  |  |  |  |  |                                                                                               |  |  |  |  |  |                                                                                       |  |  |  |  |  |                                                                           |  |  |  |  |  |                                                                                      |  |  |  |  |  |                                                         |  |  |  |  |  |  |  |  |  |
| To train my patients in the correct administration of biologic drugs                          |                                                                                                                                                                                                                                                                                                                                                                                                                                                                                                                                                                                                                                                                                                                                                                                                                                                                                                                                                                                                                                                                                                                                                                                                                                                                                                                                                                                                                                                                                                                             |                                             |                          |   |                        |   |                        |                                                                      |  |  |  |  |  |                                                                      |  |  |  |  |  |                                                                                               |  |  |  |  |  |                                                                                       |  |  |  |  |  |                                                                           |  |  |  |  |  |                                                                                      |  |  |  |  |  |                                                         |  |  |  |  |  |  |  |  |  |
| To monitor the disease progression of my patients with severe asthma                          |                                                                                                                                                                                                                                                                                                                                                                                                                                                                                                                                                                                                                                                                                                                                                                                                                                                                                                                                                                                                                                                                                                                                                                                                                                                                                                                                                                                                                                                                                                                             |                                             |                          |   |                        |   |                        |                                                                      |  |  |  |  |  |                                                                      |  |  |  |  |  |                                                                                               |  |  |  |  |  |                                                                                       |  |  |  |  |  |                                                                           |  |  |  |  |  |                                                                                      |  |  |  |  |  |                                                         |  |  |  |  |  |  |  |  |  |
| To have a better prevention of recurrence of asthma attacks in my patients with severe asthma |                                                                                                                                                                                                                                                                                                                                                                                                                                                                                                                                                                                                                                                                                                                                                                                                                                                                                                                                                                                                                                                                                                                                                                                                                                                                                                                                                                                                                                                                                                                             |                                             |                          |   |                        |   |                        |                                                                      |  |  |  |  |  |                                                                      |  |  |  |  |  |                                                                                               |  |  |  |  |  |                                                                                       |  |  |  |  |  |                                                                           |  |  |  |  |  |                                                                                      |  |  |  |  |  |                                                         |  |  |  |  |  |  |  |  |  |
| To assess therapeutic adherence to biologic therapy in my patients with severe asthma         |                                                                                                                                                                                                                                                                                                                                                                                                                                                                                                                                                                                                                                                                                                                                                                                                                                                                                                                                                                                                                                                                                                                                                                                                                                                                                                                                                                                                                                                                                                                             |                                             |                          |   |                        |   |                        |                                                                      |  |  |  |  |  |                                                                      |  |  |  |  |  |                                                                                               |  |  |  |  |  |                                                                                       |  |  |  |  |  |                                                                           |  |  |  |  |  |                                                                                      |  |  |  |  |  |                                                         |  |  |  |  |  |  |  |  |  |
| To improve adverse event reporting following biologic drug administration                     |                                                                                                                                                                                                                                                                                                                                                                                                                                                                                                                                                                                                                                                                                                                                                                                                                                                                                                                                                                                                                                                                                                                                                                                                                                                                                                                                                                                                                                                                                                                             |                                             |                          |   |                        |   |                        |                                                                      |  |  |  |  |  |                                                                      |  |  |  |  |  |                                                                                               |  |  |  |  |  |                                                                                       |  |  |  |  |  |                                                                           |  |  |  |  |  |                                                                                      |  |  |  |  |  |                                                         |  |  |  |  |  |  |  |  |  |
| To make therapeutic decisions regarding the management of my patients                         |                                                                                                                                                                                                                                                                                                                                                                                                                                                                                                                                                                                                                                                                                                                                                                                                                                                                                                                                                                                                                                                                                                                                                                                                                                                                                                                                                                                                                                                                                                                             |                                             |                          |   |                        |   |                        |                                                                      |  |  |  |  |  |                                                                      |  |  |  |  |  |                                                                                               |  |  |  |  |  |                                                                                       |  |  |  |  |  |                                                                           |  |  |  |  |  |                                                                                      |  |  |  |  |  |                                                         |  |  |  |  |  |  |  |  |  |
| 9.                                                                                            | <p>For use in clinical practice, please indicate what you intend to achieve with the use of the BioCart® for your patients with severe asthma and on home biologic therapy.</p> <p>Read each of the statements carefully and indicate your degree of agreement with each of them, where <b>1 is NEVER</b> and <b>5 is HABITUALLY</b> (<i>mark only one answer for each statement</i>).</p> <table border="1"> <thead> <tr> <th></th> <th>1<br/>NEVER</th> <th>2</th> <th>3</th> <th>4</th> <th>5<br/>HABITUALLY</th> </tr> </thead> <tbody> <tr> <td>Detecting non-compliance with treatment in my patients</td> <td></td> <td></td> <td></td> <td></td> <td></td> </tr> <tr> <td>Detect possible adverse effects after administration of the biologic</td> <td></td> <td></td> <td></td> <td></td> <td></td> </tr> <tr> <td>Optimising the time spent in consultation with my patients</td> <td></td> <td></td> <td></td> <td></td> <td></td> </tr> <tr> <td>Strengthening the relationship between health professional and patient</td> <td></td> <td></td> <td></td> <td></td> <td></td> </tr> <tr> <td>Improving communication with the patient</td> <td></td> <td></td> <td></td> <td></td> <td></td> </tr> <tr> <td>To make patients feel more confident about self-care and management of their disease</td> <td></td> <td></td> <td></td> <td></td> <td></td> </tr> <tr> <td>Follow-up of the disease in patients with severe asthma</td> <td></td> <td></td> <td></td> <td></td> <td></td> </tr> </tbody> </table> |                                             | 1<br>NEVER               | 2 | 3                      | 4 | 5<br>HABITUALLY        | Detecting non-compliance with treatment in my patients               |  |  |  |  |  | Detect possible adverse effects after administration of the biologic |  |  |  |  |  | Optimising the time spent in consultation with my patients                                    |  |  |  |  |  | Strengthening the relationship between health professional and patient                |  |  |  |  |  | Improving communication with the patient                                  |  |  |  |  |  | To make patients feel more confident about self-care and management of their disease |  |  |  |  |  | Follow-up of the disease in patients with severe asthma |  |  |  |  |  |  |  |  |  |
|                                                                                               | 1<br>NEVER                                                                                                                                                                                                                                                                                                                                                                                                                                                                                                                                                                                                                                                                                                                                                                                                                                                                                                                                                                                                                                                                                                                                                                                                                                                                                                                                                                                                                                                                                                                  | 2                                           | 3                        | 4 | 5<br>HABITUALLY        |   |                        |                                                                      |  |  |  |  |  |                                                                      |  |  |  |  |  |                                                                                               |  |  |  |  |  |                                                                                       |  |  |  |  |  |                                                                           |  |  |  |  |  |                                                                                      |  |  |  |  |  |                                                         |  |  |  |  |  |  |  |  |  |
| Detecting non-compliance with treatment in my patients                                        |                                                                                                                                                                                                                                                                                                                                                                                                                                                                                                                                                                                                                                                                                                                                                                                                                                                                                                                                                                                                                                                                                                                                                                                                                                                                                                                                                                                                                                                                                                                             |                                             |                          |   |                        |   |                        |                                                                      |  |  |  |  |  |                                                                      |  |  |  |  |  |                                                                                               |  |  |  |  |  |                                                                                       |  |  |  |  |  |                                                                           |  |  |  |  |  |                                                                                      |  |  |  |  |  |                                                         |  |  |  |  |  |  |  |  |  |
| Detect possible adverse effects after administration of the biologic                          |                                                                                                                                                                                                                                                                                                                                                                                                                                                                                                                                                                                                                                                                                                                                                                                                                                                                                                                                                                                                                                                                                                                                                                                                                                                                                                                                                                                                                                                                                                                             |                                             |                          |   |                        |   |                        |                                                                      |  |  |  |  |  |                                                                      |  |  |  |  |  |                                                                                               |  |  |  |  |  |                                                                                       |  |  |  |  |  |                                                                           |  |  |  |  |  |                                                                                      |  |  |  |  |  |                                                         |  |  |  |  |  |  |  |  |  |
| Optimising the time spent in consultation with my patients                                    |                                                                                                                                                                                                                                                                                                                                                                                                                                                                                                                                                                                                                                                                                                                                                                                                                                                                                                                                                                                                                                                                                                                                                                                                                                                                                                                                                                                                                                                                                                                             |                                             |                          |   |                        |   |                        |                                                                      |  |  |  |  |  |                                                                      |  |  |  |  |  |                                                                                               |  |  |  |  |  |                                                                                       |  |  |  |  |  |                                                                           |  |  |  |  |  |                                                                                      |  |  |  |  |  |                                                         |  |  |  |  |  |  |  |  |  |
| Strengthening the relationship between health professional and patient                        |                                                                                                                                                                                                                                                                                                                                                                                                                                                                                                                                                                                                                                                                                                                                                                                                                                                                                                                                                                                                                                                                                                                                                                                                                                                                                                                                                                                                                                                                                                                             |                                             |                          |   |                        |   |                        |                                                                      |  |  |  |  |  |                                                                      |  |  |  |  |  |                                                                                               |  |  |  |  |  |                                                                                       |  |  |  |  |  |                                                                           |  |  |  |  |  |                                                                                      |  |  |  |  |  |                                                         |  |  |  |  |  |  |  |  |  |
| Improving communication with the patient                                                      |                                                                                                                                                                                                                                                                                                                                                                                                                                                                                                                                                                                                                                                                                                                                                                                                                                                                                                                                                                                                                                                                                                                                                                                                                                                                                                                                                                                                                                                                                                                             |                                             |                          |   |                        |   |                        |                                                                      |  |  |  |  |  |                                                                      |  |  |  |  |  |                                                                                               |  |  |  |  |  |                                                                                       |  |  |  |  |  |                                                                           |  |  |  |  |  |                                                                                      |  |  |  |  |  |                                                         |  |  |  |  |  |  |  |  |  |
| To make patients feel more confident about self-care and management of their disease          |                                                                                                                                                                                                                                                                                                                                                                                                                                                                                                                                                                                                                                                                                                                                                                                                                                                                                                                                                                                                                                                                                                                                                                                                                                                                                                                                                                                                                                                                                                                             |                                             |                          |   |                        |   |                        |                                                                      |  |  |  |  |  |                                                                      |  |  |  |  |  |                                                                                               |  |  |  |  |  |                                                                                       |  |  |  |  |  |                                                                           |  |  |  |  |  |                                                                                      |  |  |  |  |  |                                                         |  |  |  |  |  |  |  |  |  |
| Follow-up of the disease in patients with severe asthma                                       |                                                                                                                                                                                                                                                                                                                                                                                                                                                                                                                                                                                                                                                                                                                                                                                                                                                                                                                                                                                                                                                                                                                                                                                                                                                                                                                                                                                                                                                                                                                             |                                             |                          |   |                        |   |                        |                                                                      |  |  |  |  |  |                                                                      |  |  |  |  |  |                                                                                               |  |  |  |  |  |                                                                                       |  |  |  |  |  |                                                                           |  |  |  |  |  |                                                                                      |  |  |  |  |  |                                                         |  |  |  |  |  |  |  |  |  |

|                   |                                                                                                                                                                                                                                                                                                                                                                                                                                                                                                                        |
|-------------------|------------------------------------------------------------------------------------------------------------------------------------------------------------------------------------------------------------------------------------------------------------------------------------------------------------------------------------------------------------------------------------------------------------------------------------------------------------------------------------------------------------------------|
| <p><b>10.</b></p> | <p>Do you think the BioCart® will help to improve the management of your patients with severe asthma on home biologic therapy? <i>(tick ONLY one answer)</i></p> <ul style="list-style-type: none"> <li><input type="radio"/> YES</li> <li><input type="radio"/> NO</li> <li><input type="radio"/> I don't know</li> </ul>                                                                                                                                                                                             |
| <p><b>11.</b></p> | <p>Do you think the BioCart® will help improve adherence to treatment? of your patients with severe asthma on home biological therapy? <i>(tick ONLY one answer)</i></p> <ul style="list-style-type: none"> <li><input type="radio"/> YES</li> <li><input type="radio"/> NO</li> <li><input type="radio"/> I don't know</li> </ul>                                                                                                                                                                                     |
| <p><b>12.</b></p> | <p>What profile of patients with severe asthma do you think will benefit from the use of the BioCart® Diary <i>(tick all that apply)?</i></p> <ul style="list-style-type: none"> <li><input type="checkbox"/> Any patient on biologic home treatment</li> <li><input type="checkbox"/> Patient on home biologic therapy with low/poor compliance</li> <li><input type="checkbox"/> Patient on home biologic therapy with frequent seizures</li> <li><input type="checkbox"/> Other/s. Please specify: _____</li> </ul> |
| <p><b>13.</b></p> | <p>What profile of healthcare professionals do you think will benefit from the use of the BioCart® Diary <i>(tick all that apply)?</i></p> <ul style="list-style-type: none"> <li><input type="checkbox"/> Allergist</li> <li><input type="checkbox"/> Pneumologist</li> <li><input type="checkbox"/> Nursing</li> <li><input type="checkbox"/> Hospital Pharmacy</li> <li><input type="checkbox"/> Other/s. Please specify: _____</li> </ul>                                                                          |

## Opinion survey for Healthcare Professionals POST use of BioCart®

| INTRODUCTION                                                                                                                                                                                                                                                                                                                                                                                                                                                                                                                                                                                                                 |                                                                                                                                                                                                                                                                                                                                                                                                                                                                                                                                                                                                                                                                                                                                                                                                                                                                                                                                                                                                                                                                                                                                                                                                                                                                                                                                                                                                                                          |                       |                             |   |                        |   |                        |                                                               |  |  |  |  |  |                                             |  |  |  |  |  |                                                 |  |  |  |  |  |                                               |  |  |  |  |  |                                                                              |  |  |  |  |  |
|------------------------------------------------------------------------------------------------------------------------------------------------------------------------------------------------------------------------------------------------------------------------------------------------------------------------------------------------------------------------------------------------------------------------------------------------------------------------------------------------------------------------------------------------------------------------------------------------------------------------------|------------------------------------------------------------------------------------------------------------------------------------------------------------------------------------------------------------------------------------------------------------------------------------------------------------------------------------------------------------------------------------------------------------------------------------------------------------------------------------------------------------------------------------------------------------------------------------------------------------------------------------------------------------------------------------------------------------------------------------------------------------------------------------------------------------------------------------------------------------------------------------------------------------------------------------------------------------------------------------------------------------------------------------------------------------------------------------------------------------------------------------------------------------------------------------------------------------------------------------------------------------------------------------------------------------------------------------------------------------------------------------------------------------------------------------------|-----------------------|-----------------------------|---|------------------------|---|------------------------|---------------------------------------------------------------|--|--|--|--|--|---------------------------------------------|--|--|--|--|--|-------------------------------------------------|--|--|--|--|--|-----------------------------------------------|--|--|--|--|--|------------------------------------------------------------------------------|--|--|--|--|--|
| <p>Dear participant:</p> <p>You are about to finish your participation in the <b>BioCart® project</b>, thank you for your involvement.</p> <p>You now need to complete a second opinion survey, the purpose of which is to <b>learn about your experience and to collect your opinion as a healthcare professional after using the BioCart® during the last months.</b></p> <p>The survey should take you no more than <b>5 minutes</b> to complete, so please <b>read the questions below carefully</b> and <b>answer as honestly as possible.</b></p> <p><b>Thank you very much for participating in this project.</b></p> |                                                                                                                                                                                                                                                                                                                                                                                                                                                                                                                                                                                                                                                                                                                                                                                                                                                                                                                                                                                                                                                                                                                                                                                                                                                                                                                                                                                                                                          |                       |                             |   |                        |   |                        |                                                               |  |  |  |  |  |                                             |  |  |  |  |  |                                                 |  |  |  |  |  |                                               |  |  |  |  |  |                                                                              |  |  |  |  |  |
| USE OF THE DIARY                                                                                                                                                                                                                                                                                                                                                                                                                                                                                                                                                                                                             |                                                                                                                                                                                                                                                                                                                                                                                                                                                                                                                                                                                                                                                                                                                                                                                                                                                                                                                                                                                                                                                                                                                                                                                                                                                                                                                                                                                                                                          |                       |                             |   |                        |   |                        |                                                               |  |  |  |  |  |                                             |  |  |  |  |  |                                                 |  |  |  |  |  |                                               |  |  |  |  |  |                                                                              |  |  |  |  |  |
| <b>1.</b>                                                                                                                                                                                                                                                                                                                                                                                                                                                                                                                                                                                                                    | How many patients with severe asthma have you delivered the BioCart®?                                                                                                                                                                                                                                                                                                                                                                                                                                                                                                                                                                                                                                                                                                                                                                                                                                                                                                                                                                                                                                                                                                                                                                                                                                                                                                                                                                    |                       |                             |   |                        |   |                        |                                                               |  |  |  |  |  |                                             |  |  |  |  |  |                                                 |  |  |  |  |  |                                               |  |  |  |  |  |                                                                              |  |  |  |  |  |
| <b>2.</b>                                                                                                                                                                                                                                                                                                                                                                                                                                                                                                                                                                                                                    | Of these, how many patients brought their completed BioCart® to the next follow-up visit?                                                                                                                                                                                                                                                                                                                                                                                                                                                                                                                                                                                                                                                                                                                                                                                                                                                                                                                                                                                                                                                                                                                                                                                                                                                                                                                                                |                       |                             |   |                        |   |                        |                                                               |  |  |  |  |  |                                             |  |  |  |  |  |                                                 |  |  |  |  |  |                                               |  |  |  |  |  |                                                                              |  |  |  |  |  |
| <b>3.</b>                                                                                                                                                                                                                                                                                                                                                                                                                                                                                                                                                                                                                    | <p>Here are several statements related to the BioCart® Diary.</p> <p>Following your experience of use, please rate your agreement with each of the statements, with <b>1 NOT AT ALL AGREE</b> and <b>5 STRONGLY AGREE</b> (<i>please tick only one answer for each statement</i>).</p> <table border="1" style="width: 100%; border-collapse: collapse;"> <thead> <tr> <th style="width: 60%;">The BioCart® Diary...</th> <th style="width: 10%; text-align: center;">1<br/>NOT AT<br/>ALL<br/>AGREE</th> <th style="width: 10%; text-align: center;">2</th> <th style="width: 10%; text-align: center;">3</th> <th style="width: 10%; text-align: center;">4</th> <th style="width: 10%; text-align: center;">5<br/>STRONGLY<br/>AGREE</th> </tr> </thead> <tbody> <tr> <td>... has been easy to use for me as a health care professional</td> <td></td> <td></td> <td></td> <td></td> <td></td> </tr> <tr> <td>... has been easy to explain to my patients</td> <td></td> <td></td> <td></td> <td></td> <td></td> </tr> <tr> <td>... has been easy to understand for my patients</td> <td></td> <td></td> <td></td> <td></td> <td></td> </tr> <tr> <td>... has been easy to complete for my patients</td> <td></td> <td></td> <td></td> <td></td> <td></td> </tr> <tr> <td>... has been easy to analyse (once filled in) by me as a health professional</td> <td></td> <td></td> <td></td> <td></td> <td></td> </tr> </tbody> </table> | The BioCart® Diary... | 1<br>NOT AT<br>ALL<br>AGREE | 2 | 3                      | 4 | 5<br>STRONGLY<br>AGREE | ... has been easy to use for me as a health care professional |  |  |  |  |  | ... has been easy to explain to my patients |  |  |  |  |  | ... has been easy to understand for my patients |  |  |  |  |  | ... has been easy to complete for my patients |  |  |  |  |  | ... has been easy to analyse (once filled in) by me as a health professional |  |  |  |  |  |
| The BioCart® Diary...                                                                                                                                                                                                                                                                                                                                                                                                                                                                                                                                                                                                        | 1<br>NOT AT<br>ALL<br>AGREE                                                                                                                                                                                                                                                                                                                                                                                                                                                                                                                                                                                                                                                                                                                                                                                                                                                                                                                                                                                                                                                                                                                                                                                                                                                                                                                                                                                                              | 2                     | 3                           | 4 | 5<br>STRONGLY<br>AGREE |   |                        |                                                               |  |  |  |  |  |                                             |  |  |  |  |  |                                                 |  |  |  |  |  |                                               |  |  |  |  |  |                                                                              |  |  |  |  |  |
| ... has been easy to use for me as a health care professional                                                                                                                                                                                                                                                                                                                                                                                                                                                                                                                                                                |                                                                                                                                                                                                                                                                                                                                                                                                                                                                                                                                                                                                                                                                                                                                                                                                                                                                                                                                                                                                                                                                                                                                                                                                                                                                                                                                                                                                                                          |                       |                             |   |                        |   |                        |                                                               |  |  |  |  |  |                                             |  |  |  |  |  |                                                 |  |  |  |  |  |                                               |  |  |  |  |  |                                                                              |  |  |  |  |  |
| ... has been easy to explain to my patients                                                                                                                                                                                                                                                                                                                                                                                                                                                                                                                                                                                  |                                                                                                                                                                                                                                                                                                                                                                                                                                                                                                                                                                                                                                                                                                                                                                                                                                                                                                                                                                                                                                                                                                                                                                                                                                                                                                                                                                                                                                          |                       |                             |   |                        |   |                        |                                                               |  |  |  |  |  |                                             |  |  |  |  |  |                                                 |  |  |  |  |  |                                               |  |  |  |  |  |                                                                              |  |  |  |  |  |
| ... has been easy to understand for my patients                                                                                                                                                                                                                                                                                                                                                                                                                                                                                                                                                                              |                                                                                                                                                                                                                                                                                                                                                                                                                                                                                                                                                                                                                                                                                                                                                                                                                                                                                                                                                                                                                                                                                                                                                                                                                                                                                                                                                                                                                                          |                       |                             |   |                        |   |                        |                                                               |  |  |  |  |  |                                             |  |  |  |  |  |                                                 |  |  |  |  |  |                                               |  |  |  |  |  |                                                                              |  |  |  |  |  |
| ... has been easy to complete for my patients                                                                                                                                                                                                                                                                                                                                                                                                                                                                                                                                                                                |                                                                                                                                                                                                                                                                                                                                                                                                                                                                                                                                                                                                                                                                                                                                                                                                                                                                                                                                                                                                                                                                                                                                                                                                                                                                                                                                                                                                                                          |                       |                             |   |                        |   |                        |                                                               |  |  |  |  |  |                                             |  |  |  |  |  |                                                 |  |  |  |  |  |                                               |  |  |  |  |  |                                                                              |  |  |  |  |  |
| ... has been easy to analyse (once filled in) by me as a health professional                                                                                                                                                                                                                                                                                                                                                                                                                                                                                                                                                 |                                                                                                                                                                                                                                                                                                                                                                                                                                                                                                                                                                                                                                                                                                                                                                                                                                                                                                                                                                                                                                                                                                                                                                                                                                                                                                                                                                                                                                          |                       |                             |   |                        |   |                        |                                                               |  |  |  |  |  |                                             |  |  |  |  |  |                                                 |  |  |  |  |  |                                               |  |  |  |  |  |                                                                              |  |  |  |  |  |



| BIOCART® DIARY ASSESSMENT                                                                                                                                                                                                                                                                                                                                                                                                                                                                                   |                                                                                                                                                                                                                                                                                                                                                                                                                                                                                                                                                                                                                                                                                                                                                                                                                                                                                                                                                                                                                                                                                                                                                                                                                                                                                                                                                                              |   |   |   |                 |  |            |   |   |   |                 |                                                                         |  |  |  |  |  |                                                                                 |  |  |  |  |  |                                                                                               |  |  |  |  |  |                                                                                              |  |  |  |  |  |                                                                           |  |  |  |  |  |                                                                       |  |  |  |  |  |                                                                                            |  |  |  |  |  |                                                                          |  |  |  |  |  |
|-------------------------------------------------------------------------------------------------------------------------------------------------------------------------------------------------------------------------------------------------------------------------------------------------------------------------------------------------------------------------------------------------------------------------------------------------------------------------------------------------------------|------------------------------------------------------------------------------------------------------------------------------------------------------------------------------------------------------------------------------------------------------------------------------------------------------------------------------------------------------------------------------------------------------------------------------------------------------------------------------------------------------------------------------------------------------------------------------------------------------------------------------------------------------------------------------------------------------------------------------------------------------------------------------------------------------------------------------------------------------------------------------------------------------------------------------------------------------------------------------------------------------------------------------------------------------------------------------------------------------------------------------------------------------------------------------------------------------------------------------------------------------------------------------------------------------------------------------------------------------------------------------|---|---|---|-----------------|--|------------|---|---|---|-----------------|-------------------------------------------------------------------------|--|--|--|--|--|---------------------------------------------------------------------------------|--|--|--|--|--|-----------------------------------------------------------------------------------------------|--|--|--|--|--|----------------------------------------------------------------------------------------------|--|--|--|--|--|---------------------------------------------------------------------------|--|--|--|--|--|-----------------------------------------------------------------------|--|--|--|--|--|--------------------------------------------------------------------------------------------|--|--|--|--|--|--------------------------------------------------------------------------|--|--|--|--|--|
| <p><b>4.</b> Now that you have used the BioCart® with some of your patients with severe asthma and on home biologic therapy, we would like you to answer some questions to better understand how you have found this material useful.</p> <p>Please read the following statements carefully and indicate your degree of agreement with each of them, where <b>1 is NEVER</b> and <b>5 is HABITUALLY</b> (<i>please tick only one answer for each statement</i>).</p>                                        | <table border="1"> <thead> <tr> <th></th> <th>1<br/>NEVER</th> <th>2</th> <th>3</th> <th>4</th> <th>5<br/>HABITUALLY</th> </tr> </thead> <tbody> <tr> <td>To train my patients in the correct administration of biologic drugs</td> <td></td> <td></td> <td></td> <td></td> <td></td> </tr> <tr> <td>To monitor the disease progression of my patients with severe asthma</td> <td></td> <td></td> <td></td> <td></td> <td></td> </tr> <tr> <td>To have a better prevention of recurrence of asthma attacks in my patients with severe asthma</td> <td></td> <td></td> <td></td> <td></td> <td></td> </tr> <tr> <td>To assess the degree of therapeutic adherence to treatment in my patients with severe asthma</td> <td></td> <td></td> <td></td> <td></td> <td></td> </tr> <tr> <td>To improve adverse event reporting following biologic drug administration</td> <td></td> <td></td> <td></td> <td></td> <td></td> </tr> <tr> <td>To make therapeutic decisions regarding the management of my patients</td> <td></td> <td></td> <td></td> <td></td> <td></td> </tr> </tbody> </table>                                                                                                                                                                                                                                                                                  |   |   |   |                 |  | 1<br>NEVER | 2 | 3 | 4 | 5<br>HABITUALLY | To train my patients in the correct administration of biologic drugs    |  |  |  |  |  | To monitor the disease progression of my patients with severe asthma            |  |  |  |  |  | To have a better prevention of recurrence of asthma attacks in my patients with severe asthma |  |  |  |  |  | To assess the degree of therapeutic adherence to treatment in my patients with severe asthma |  |  |  |  |  | To improve adverse event reporting following biologic drug administration |  |  |  |  |  | To make therapeutic decisions regarding the management of my patients |  |  |  |  |  |                                                                                            |  |  |  |  |  |                                                                          |  |  |  |  |  |
|                                                                                                                                                                                                                                                                                                                                                                                                                                                                                                             | 1<br>NEVER                                                                                                                                                                                                                                                                                                                                                                                                                                                                                                                                                                                                                                                                                                                                                                                                                                                                                                                                                                                                                                                                                                                                                                                                                                                                                                                                                                   | 2 | 3 | 4 | 5<br>HABITUALLY |  |            |   |   |   |                 |                                                                         |  |  |  |  |  |                                                                                 |  |  |  |  |  |                                                                                               |  |  |  |  |  |                                                                                              |  |  |  |  |  |                                                                           |  |  |  |  |  |                                                                       |  |  |  |  |  |                                                                                            |  |  |  |  |  |                                                                          |  |  |  |  |  |
| To train my patients in the correct administration of biologic drugs                                                                                                                                                                                                                                                                                                                                                                                                                                        |                                                                                                                                                                                                                                                                                                                                                                                                                                                                                                                                                                                                                                                                                                                                                                                                                                                                                                                                                                                                                                                                                                                                                                                                                                                                                                                                                                              |   |   |   |                 |  |            |   |   |   |                 |                                                                         |  |  |  |  |  |                                                                                 |  |  |  |  |  |                                                                                               |  |  |  |  |  |                                                                                              |  |  |  |  |  |                                                                           |  |  |  |  |  |                                                                       |  |  |  |  |  |                                                                                            |  |  |  |  |  |                                                                          |  |  |  |  |  |
| To monitor the disease progression of my patients with severe asthma                                                                                                                                                                                                                                                                                                                                                                                                                                        |                                                                                                                                                                                                                                                                                                                                                                                                                                                                                                                                                                                                                                                                                                                                                                                                                                                                                                                                                                                                                                                                                                                                                                                                                                                                                                                                                                              |   |   |   |                 |  |            |   |   |   |                 |                                                                         |  |  |  |  |  |                                                                                 |  |  |  |  |  |                                                                                               |  |  |  |  |  |                                                                                              |  |  |  |  |  |                                                                           |  |  |  |  |  |                                                                       |  |  |  |  |  |                                                                                            |  |  |  |  |  |                                                                          |  |  |  |  |  |
| To have a better prevention of recurrence of asthma attacks in my patients with severe asthma                                                                                                                                                                                                                                                                                                                                                                                                               |                                                                                                                                                                                                                                                                                                                                                                                                                                                                                                                                                                                                                                                                                                                                                                                                                                                                                                                                                                                                                                                                                                                                                                                                                                                                                                                                                                              |   |   |   |                 |  |            |   |   |   |                 |                                                                         |  |  |  |  |  |                                                                                 |  |  |  |  |  |                                                                                               |  |  |  |  |  |                                                                                              |  |  |  |  |  |                                                                           |  |  |  |  |  |                                                                       |  |  |  |  |  |                                                                                            |  |  |  |  |  |                                                                          |  |  |  |  |  |
| To assess the degree of therapeutic adherence to treatment in my patients with severe asthma                                                                                                                                                                                                                                                                                                                                                                                                                |                                                                                                                                                                                                                                                                                                                                                                                                                                                                                                                                                                                                                                                                                                                                                                                                                                                                                                                                                                                                                                                                                                                                                                                                                                                                                                                                                                              |   |   |   |                 |  |            |   |   |   |                 |                                                                         |  |  |  |  |  |                                                                                 |  |  |  |  |  |                                                                                               |  |  |  |  |  |                                                                                              |  |  |  |  |  |                                                                           |  |  |  |  |  |                                                                       |  |  |  |  |  |                                                                                            |  |  |  |  |  |                                                                          |  |  |  |  |  |
| To improve adverse event reporting following biologic drug administration                                                                                                                                                                                                                                                                                                                                                                                                                                   |                                                                                                                                                                                                                                                                                                                                                                                                                                                                                                                                                                                                                                                                                                                                                                                                                                                                                                                                                                                                                                                                                                                                                                                                                                                                                                                                                                              |   |   |   |                 |  |            |   |   |   |                 |                                                                         |  |  |  |  |  |                                                                                 |  |  |  |  |  |                                                                                               |  |  |  |  |  |                                                                                              |  |  |  |  |  |                                                                           |  |  |  |  |  |                                                                       |  |  |  |  |  |                                                                                            |  |  |  |  |  |                                                                          |  |  |  |  |  |
| To make therapeutic decisions regarding the management of my patients                                                                                                                                                                                                                                                                                                                                                                                                                                       |                                                                                                                                                                                                                                                                                                                                                                                                                                                                                                                                                                                                                                                                                                                                                                                                                                                                                                                                                                                                                                                                                                                                                                                                                                                                                                                                                                              |   |   |   |                 |  |            |   |   |   |                 |                                                                         |  |  |  |  |  |                                                                                 |  |  |  |  |  |                                                                                               |  |  |  |  |  |                                                                                              |  |  |  |  |  |                                                                           |  |  |  |  |  |                                                                       |  |  |  |  |  |                                                                                            |  |  |  |  |  |                                                                          |  |  |  |  |  |
| <p><b>5.</b> Now that you have used the BioCart® with some of your patients with severe asthma and on home biologic therapy, we would like to know what you have achieved with the use of this material.</p> <p>Please read the following statements carefully and indicate your degree of agreement with each of them, where <b>1 is NEVER</b> and <b>5 is HABITUALLY</b> (<i>please tick only one answer for each statement</i>).</p>                                                                     | <table border="1"> <thead> <tr> <th></th> <th>1<br/>NEVER</th> <th>2</th> <th>3</th> <th>4</th> <th>5<br/>HABITUALLY</th> </tr> </thead> <tbody> <tr> <td>It has helped me to detect non-compliance with treatment in my patients</td> <td></td> <td></td> <td></td> <td></td> <td></td> </tr> <tr> <td>It has been used to detect adverse effects after administration of the biologic</td> <td></td> <td></td> <td></td> <td></td> <td></td> </tr> <tr> <td>It has helped me to optimise my consultations with my patients</td> <td></td> <td></td> <td></td> <td></td> <td></td> </tr> <tr> <td>It has served to strengthen the relationship between the health professional and the patient</td> <td></td> <td></td> <td></td> <td></td> <td></td> </tr> <tr> <td>It has helped to optimise the time spent in consultation with the patient</td> <td></td> <td></td> <td></td> <td></td> <td></td> </tr> <tr> <td>It has helped to improve communication with the patient</td> <td></td> <td></td> <td></td> <td></td> <td></td> </tr> <tr> <td>It has helped patients feel more confident about self-care and management of their disease</td> <td></td> <td></td> <td></td> <td></td> <td></td> </tr> <tr> <td>It has been used to monitor the condition of patients with severe asthma</td> <td></td> <td></td> <td></td> <td></td> <td></td> </tr> </tbody> </table> |   |   |   |                 |  | 1<br>NEVER | 2 | 3 | 4 | 5<br>HABITUALLY | It has helped me to detect non-compliance with treatment in my patients |  |  |  |  |  | It has been used to detect adverse effects after administration of the biologic |  |  |  |  |  | It has helped me to optimise my consultations with my patients                                |  |  |  |  |  | It has served to strengthen the relationship between the health professional and the patient |  |  |  |  |  | It has helped to optimise the time spent in consultation with the patient |  |  |  |  |  | It has helped to improve communication with the patient               |  |  |  |  |  | It has helped patients feel more confident about self-care and management of their disease |  |  |  |  |  | It has been used to monitor the condition of patients with severe asthma |  |  |  |  |  |
|                                                                                                                                                                                                                                                                                                                                                                                                                                                                                                             | 1<br>NEVER                                                                                                                                                                                                                                                                                                                                                                                                                                                                                                                                                                                                                                                                                                                                                                                                                                                                                                                                                                                                                                                                                                                                                                                                                                                                                                                                                                   | 2 | 3 | 4 | 5<br>HABITUALLY |  |            |   |   |   |                 |                                                                         |  |  |  |  |  |                                                                                 |  |  |  |  |  |                                                                                               |  |  |  |  |  |                                                                                              |  |  |  |  |  |                                                                           |  |  |  |  |  |                                                                       |  |  |  |  |  |                                                                                            |  |  |  |  |  |                                                                          |  |  |  |  |  |
| It has helped me to detect non-compliance with treatment in my patients                                                                                                                                                                                                                                                                                                                                                                                                                                     |                                                                                                                                                                                                                                                                                                                                                                                                                                                                                                                                                                                                                                                                                                                                                                                                                                                                                                                                                                                                                                                                                                                                                                                                                                                                                                                                                                              |   |   |   |                 |  |            |   |   |   |                 |                                                                         |  |  |  |  |  |                                                                                 |  |  |  |  |  |                                                                                               |  |  |  |  |  |                                                                                              |  |  |  |  |  |                                                                           |  |  |  |  |  |                                                                       |  |  |  |  |  |                                                                                            |  |  |  |  |  |                                                                          |  |  |  |  |  |
| It has been used to detect adverse effects after administration of the biologic                                                                                                                                                                                                                                                                                                                                                                                                                             |                                                                                                                                                                                                                                                                                                                                                                                                                                                                                                                                                                                                                                                                                                                                                                                                                                                                                                                                                                                                                                                                                                                                                                                                                                                                                                                                                                              |   |   |   |                 |  |            |   |   |   |                 |                                                                         |  |  |  |  |  |                                                                                 |  |  |  |  |  |                                                                                               |  |  |  |  |  |                                                                                              |  |  |  |  |  |                                                                           |  |  |  |  |  |                                                                       |  |  |  |  |  |                                                                                            |  |  |  |  |  |                                                                          |  |  |  |  |  |
| It has helped me to optimise my consultations with my patients                                                                                                                                                                                                                                                                                                                                                                                                                                              |                                                                                                                                                                                                                                                                                                                                                                                                                                                                                                                                                                                                                                                                                                                                                                                                                                                                                                                                                                                                                                                                                                                                                                                                                                                                                                                                                                              |   |   |   |                 |  |            |   |   |   |                 |                                                                         |  |  |  |  |  |                                                                                 |  |  |  |  |  |                                                                                               |  |  |  |  |  |                                                                                              |  |  |  |  |  |                                                                           |  |  |  |  |  |                                                                       |  |  |  |  |  |                                                                                            |  |  |  |  |  |                                                                          |  |  |  |  |  |
| It has served to strengthen the relationship between the health professional and the patient                                                                                                                                                                                                                                                                                                                                                                                                                |                                                                                                                                                                                                                                                                                                                                                                                                                                                                                                                                                                                                                                                                                                                                                                                                                                                                                                                                                                                                                                                                                                                                                                                                                                                                                                                                                                              |   |   |   |                 |  |            |   |   |   |                 |                                                                         |  |  |  |  |  |                                                                                 |  |  |  |  |  |                                                                                               |  |  |  |  |  |                                                                                              |  |  |  |  |  |                                                                           |  |  |  |  |  |                                                                       |  |  |  |  |  |                                                                                            |  |  |  |  |  |                                                                          |  |  |  |  |  |
| It has helped to optimise the time spent in consultation with the patient                                                                                                                                                                                                                                                                                                                                                                                                                                   |                                                                                                                                                                                                                                                                                                                                                                                                                                                                                                                                                                                                                                                                                                                                                                                                                                                                                                                                                                                                                                                                                                                                                                                                                                                                                                                                                                              |   |   |   |                 |  |            |   |   |   |                 |                                                                         |  |  |  |  |  |                                                                                 |  |  |  |  |  |                                                                                               |  |  |  |  |  |                                                                                              |  |  |  |  |  |                                                                           |  |  |  |  |  |                                                                       |  |  |  |  |  |                                                                                            |  |  |  |  |  |                                                                          |  |  |  |  |  |
| It has helped to improve communication with the patient                                                                                                                                                                                                                                                                                                                                                                                                                                                     |                                                                                                                                                                                                                                                                                                                                                                                                                                                                                                                                                                                                                                                                                                                                                                                                                                                                                                                                                                                                                                                                                                                                                                                                                                                                                                                                                                              |   |   |   |                 |  |            |   |   |   |                 |                                                                         |  |  |  |  |  |                                                                                 |  |  |  |  |  |                                                                                               |  |  |  |  |  |                                                                                              |  |  |  |  |  |                                                                           |  |  |  |  |  |                                                                       |  |  |  |  |  |                                                                                            |  |  |  |  |  |                                                                          |  |  |  |  |  |
| It has helped patients feel more confident about self-care and management of their disease                                                                                                                                                                                                                                                                                                                                                                                                                  |                                                                                                                                                                                                                                                                                                                                                                                                                                                                                                                                                                                                                                                                                                                                                                                                                                                                                                                                                                                                                                                                                                                                                                                                                                                                                                                                                                              |   |   |   |                 |  |            |   |   |   |                 |                                                                         |  |  |  |  |  |                                                                                 |  |  |  |  |  |                                                                                               |  |  |  |  |  |                                                                                              |  |  |  |  |  |                                                                           |  |  |  |  |  |                                                                       |  |  |  |  |  |                                                                                            |  |  |  |  |  |                                                                          |  |  |  |  |  |
| It has been used to monitor the condition of patients with severe asthma                                                                                                                                                                                                                                                                                                                                                                                                                                    |                                                                                                                                                                                                                                                                                                                                                                                                                                                                                                                                                                                                                                                                                                                                                                                                                                                                                                                                                                                                                                                                                                                                                                                                                                                                                                                                                                              |   |   |   |                 |  |            |   |   |   |                 |                                                                         |  |  |  |  |  |                                                                                 |  |  |  |  |  |                                                                                               |  |  |  |  |  |                                                                                              |  |  |  |  |  |                                                                           |  |  |  |  |  |                                                                       |  |  |  |  |  |                                                                                            |  |  |  |  |  |                                                                          |  |  |  |  |  |
| <p><b>6.</b> Which sections of the BioCart® Diary did you find most useful (<i>tick all that apply</i>)?</p> <ul style="list-style-type: none"> <li><input type="checkbox"/> Patient information section</li> <li><input type="checkbox"/> Patient Data Record - Asthma Control Test (ACT )™</li> <li><input type="checkbox"/> Patient data recording - Dose administration</li> <li><input type="checkbox"/> Adverse reaction register</li> <li><input type="checkbox"/> Asthma crises register</li> </ul> |                                                                                                                                                                                                                                                                                                                                                                                                                                                                                                                                                                                                                                                                                                                                                                                                                                                                                                                                                                                                                                                                                                                                                                                                                                                                                                                                                                              |   |   |   |                 |  |            |   |   |   |                 |                                                                         |  |  |  |  |  |                                                                                 |  |  |  |  |  |                                                                                               |  |  |  |  |  |                                                                                              |  |  |  |  |  |                                                                           |  |  |  |  |  |                                                                       |  |  |  |  |  |                                                                                            |  |  |  |  |  |                                                                          |  |  |  |  |  |

| <b>7.</b>                                                                          | <p>Would you say that the use of the BioCart® has improved the adherence of your patients with severe asthma (<i>tick ONLY one answer</i>)?</p> <ul style="list-style-type: none"> <li><input type="radio"/> Yes, they have been more compliant with the Diary (therapeutic attachment).</li> <li><input type="radio"/> As compliant as before using the Diary (therapeutic adherence).</li> <li><input type="radio"/> No, they have been less compliant than before using the Diary (therapeutic adherence).</li> </ul>                                                                                                                                                                                                                                                                                                                                                                                                                                                                                                                                                                                                                                                                                                                                                                                                                                                                                                                                                       |   |                     |   |                      |   |                      |                                        |  |  |  |  |  |                                                              |  |  |  |  |  |                                                                                    |  |  |  |  |  |                                                         |  |  |  |  |  |                                |  |  |  |  |  |
|------------------------------------------------------------------------------------|--------------------------------------------------------------------------------------------------------------------------------------------------------------------------------------------------------------------------------------------------------------------------------------------------------------------------------------------------------------------------------------------------------------------------------------------------------------------------------------------------------------------------------------------------------------------------------------------------------------------------------------------------------------------------------------------------------------------------------------------------------------------------------------------------------------------------------------------------------------------------------------------------------------------------------------------------------------------------------------------------------------------------------------------------------------------------------------------------------------------------------------------------------------------------------------------------------------------------------------------------------------------------------------------------------------------------------------------------------------------------------------------------------------------------------------------------------------------------------|---|---------------------|---|----------------------|---|----------------------|----------------------------------------|--|--|--|--|--|--------------------------------------------------------------|--|--|--|--|--|------------------------------------------------------------------------------------|--|--|--|--|--|---------------------------------------------------------|--|--|--|--|--|--------------------------------|--|--|--|--|--|
| <b>8.</b>                                                                          | <p>In general, have your patients reported a favourable opinion of the BioCart® Diary (<i>tick ONLY one answer</i>)?</p> <ul style="list-style-type: none"> <li><input type="radio"/> YES</li> <li><input type="radio"/> NO</li> <li><input type="radio"/> I don't know</li> </ul>                                                                                                                                                                                                                                                                                                                                                                                                                                                                                                                                                                                                                                                                                                                                                                                                                                                                                                                                                                                                                                                                                                                                                                                             |   |                     |   |                      |   |                      |                                        |  |  |  |  |  |                                                              |  |  |  |  |  |                                                                                    |  |  |  |  |  |                                                         |  |  |  |  |  |                                |  |  |  |  |  |
| <b>9.</b>                                                                          | <p>In general, have your patients experienced any difficulties in completing the BioCart® Diary (<i>tick ONLY one answer</i>)?</p> <ul style="list-style-type: none"> <li><input type="radio"/> YES</li> <li><input type="radio"/> NO</li> <li><input type="radio"/> I don't know</li> </ul>                                                                                                                                                                                                                                                                                                                                                                                                                                                                                                                                                                                                                                                                                                                                                                                                                                                                                                                                                                                                                                                                                                                                                                                   |   |                     |   |                      |   |                      |                                        |  |  |  |  |  |                                                              |  |  |  |  |  |                                                                                    |  |  |  |  |  |                                                         |  |  |  |  |  |                                |  |  |  |  |  |
| <b>10.</b>                                                                         | <p style="color: red;">[Question Q10 is only for those who have answered YES in Q9. The rest skip to question Q11]</p> <p>Please note down the most frequent problems your patients have experienced using the BioCart® diary:</p>                                                                                                                                                                                                                                                                                                                                                                                                                                                                                                                                                                                                                                                                                                                                                                                                                                                                                                                                                                                                                                                                                                                                                                                                                                             |   |                     |   |                      |   |                      |                                        |  |  |  |  |  |                                                              |  |  |  |  |  |                                                                                    |  |  |  |  |  |                                                         |  |  |  |  |  |                                |  |  |  |  |  |
| <b>FUTURE USE OF THE BIOCART® DIARY</b>                                            |                                                                                                                                                                                                                                                                                                                                                                                                                                                                                                                                                                                                                                                                                                                                                                                                                                                                                                                                                                                                                                                                                                                                                                                                                                                                                                                                                                                                                                                                                |   |                     |   |                      |   |                      |                                        |  |  |  |  |  |                                                              |  |  |  |  |  |                                                                                    |  |  |  |  |  |                                                         |  |  |  |  |  |                                |  |  |  |  |  |
| <b>11.</b>                                                                         | <p>Based on your experience with the BioCart®, how likely is it that you would use it again for your patients with severe asthma on home biologic therapy? (<i>tick ONLY one answer</i>)</p> <ul style="list-style-type: none"> <li><input type="radio"/> I'm sure it is</li> <li><input type="radio"/> It is likely to</li> <li><input type="radio"/> Maybe or maybe not</li> <li><input type="radio"/> It is likely that it will not</li> <li><input type="radio"/> Surely not</li> </ul>                                                                                                                                                                                                                                                                                                                                                                                                                                                                                                                                                                                                                                                                                                                                                                                                                                                                                                                                                                                    |   |                     |   |                      |   |                      |                                        |  |  |  |  |  |                                                              |  |  |  |  |  |                                                                                    |  |  |  |  |  |                                                         |  |  |  |  |  |                                |  |  |  |  |  |
| <b>12.</b>                                                                         | <p>Thinking about the future use of the BioCart®, which patients would you consider giving the BioCart® to?</p> <p>Please carefully read the patient profiles described below and indicate the answer that best fits your opinion, with <b>1</b> being <b>SURE NO</b> and <b>5</b> being <b>SURE YES</b> (<i>please tick only one answer for each statement</i>):</p> <table border="1" style="width: 100%; border-collapse: collapse;"> <thead> <tr> <th style="width: 60%;"></th> <th style="width: 10%; text-align: center;">1<br/><i>SURE NO</i></th> <th style="width: 10%; text-align: center;">2</th> <th style="width: 10%; text-align: center;">3</th> <th style="width: 10%; text-align: center;">4</th> <th style="width: 10%; text-align: center;">5<br/><i>SURE YES</i></th> </tr> </thead> <tbody> <tr> <td>Any patient on biologic home treatment</td> <td></td> <td></td> <td></td> <td></td> <td></td> </tr> <tr> <td>Patient with whom home biological therapy is being initiated</td> <td></td> <td></td> <td></td> <td></td> <td></td> </tr> <tr> <td>Patient on home biological treatment with poor compliance (therapeutic adherence).</td> <td></td> <td></td> <td></td> <td></td> <td></td> </tr> <tr> <td>Patient on home biologic therapy with frequent seizures</td> <td></td> <td></td> <td></td> <td></td> <td></td> </tr> <tr> <td>Other/s. Please specify: _____</td> <td></td> <td></td> <td></td> <td></td> <td></td> </tr> </tbody> </table> |   | 1<br><i>SURE NO</i> | 2 | 3                    | 4 | 5<br><i>SURE YES</i> | Any patient on biologic home treatment |  |  |  |  |  | Patient with whom home biological therapy is being initiated |  |  |  |  |  | Patient on home biological treatment with poor compliance (therapeutic adherence). |  |  |  |  |  | Patient on home biologic therapy with frequent seizures |  |  |  |  |  | Other/s. Please specify: _____ |  |  |  |  |  |
|                                                                                    | 1<br><i>SURE NO</i>                                                                                                                                                                                                                                                                                                                                                                                                                                                                                                                                                                                                                                                                                                                                                                                                                                                                                                                                                                                                                                                                                                                                                                                                                                                                                                                                                                                                                                                            | 2 | 3                   | 4 | 5<br><i>SURE YES</i> |   |                      |                                        |  |  |  |  |  |                                                              |  |  |  |  |  |                                                                                    |  |  |  |  |  |                                                         |  |  |  |  |  |                                |  |  |  |  |  |
| Any patient on biologic home treatment                                             |                                                                                                                                                                                                                                                                                                                                                                                                                                                                                                                                                                                                                                                                                                                                                                                                                                                                                                                                                                                                                                                                                                                                                                                                                                                                                                                                                                                                                                                                                |   |                     |   |                      |   |                      |                                        |  |  |  |  |  |                                                              |  |  |  |  |  |                                                                                    |  |  |  |  |  |                                                         |  |  |  |  |  |                                |  |  |  |  |  |
| Patient with whom home biological therapy is being initiated                       |                                                                                                                                                                                                                                                                                                                                                                                                                                                                                                                                                                                                                                                                                                                                                                                                                                                                                                                                                                                                                                                                                                                                                                                                                                                                                                                                                                                                                                                                                |   |                     |   |                      |   |                      |                                        |  |  |  |  |  |                                                              |  |  |  |  |  |                                                                                    |  |  |  |  |  |                                                         |  |  |  |  |  |                                |  |  |  |  |  |
| Patient on home biological treatment with poor compliance (therapeutic adherence). |                                                                                                                                                                                                                                                                                                                                                                                                                                                                                                                                                                                                                                                                                                                                                                                                                                                                                                                                                                                                                                                                                                                                                                                                                                                                                                                                                                                                                                                                                |   |                     |   |                      |   |                      |                                        |  |  |  |  |  |                                                              |  |  |  |  |  |                                                                                    |  |  |  |  |  |                                                         |  |  |  |  |  |                                |  |  |  |  |  |
| Patient on home biologic therapy with frequent seizures                            |                                                                                                                                                                                                                                                                                                                                                                                                                                                                                                                                                                                                                                                                                                                                                                                                                                                                                                                                                                                                                                                                                                                                                                                                                                                                                                                                                                                                                                                                                |   |                     |   |                      |   |                      |                                        |  |  |  |  |  |                                                              |  |  |  |  |  |                                                                                    |  |  |  |  |  |                                                         |  |  |  |  |  |                                |  |  |  |  |  |
| Other/s. Please specify: _____                                                     |                                                                                                                                                                                                                                                                                                                                                                                                                                                                                                                                                                                                                                                                                                                                                                                                                                                                                                                                                                                                                                                                                                                                                                                                                                                                                                                                                                                                                                                                                |   |                     |   |                      |   |                      |                                        |  |  |  |  |  |                                                              |  |  |  |  |  |                                                                                    |  |  |  |  |  |                                                         |  |  |  |  |  |                                |  |  |  |  |  |

|                   |                                                                                                                                                                                                                                                                                                                                                                                                                                                       |
|-------------------|-------------------------------------------------------------------------------------------------------------------------------------------------------------------------------------------------------------------------------------------------------------------------------------------------------------------------------------------------------------------------------------------------------------------------------------------------------|
| <p><b>13.</b></p> | <p>What profile of healthcare professionals do you think will benefit in the future from the use of the BioCart®? <i>(tick all that apply)</i></p> <ul style="list-style-type: none"> <li><input type="checkbox"/> Allergist</li> <li><input type="checkbox"/> Pneumologist</li> <li><input type="checkbox"/> Nursing</li> <li><input type="checkbox"/> Hospital Pharmacy</li> <li><input type="checkbox"/> Other/s. Please specify: _____</li> </ul> |
| <p><b>14.</b></p> | <p>Based on your experience with the BioCart® Diary, would you recommend it to a colleague <i>(tick ONLY one answer)?</i></p> <ul style="list-style-type: none"> <li><input type="radio"/> For sure</li> <li><input type="radio"/> It is likely to</li> <li><input type="radio"/> Maybe or maybe not</li> <li><input type="radio"/> It is likely that it will not</li> <li><input type="radio"/> Surely not</li> </ul>                                |
