# Supplementary figures and images for: BioCart© Opinion-based Study on Home Administration Support for Biological Therapies in Patients with Severe Asthma
Source: PubMed Central journal article supplement — Open Respir Arch. 2024 Nov 14;7(1):100375. doi: 10.1016/j.opresp.2024.100375 (PMC11663953; doi:10.1016/j.opresp.2024.100375), 2024-11-14

## PATIENTS FEEL THAT BETWEEN VISITS...

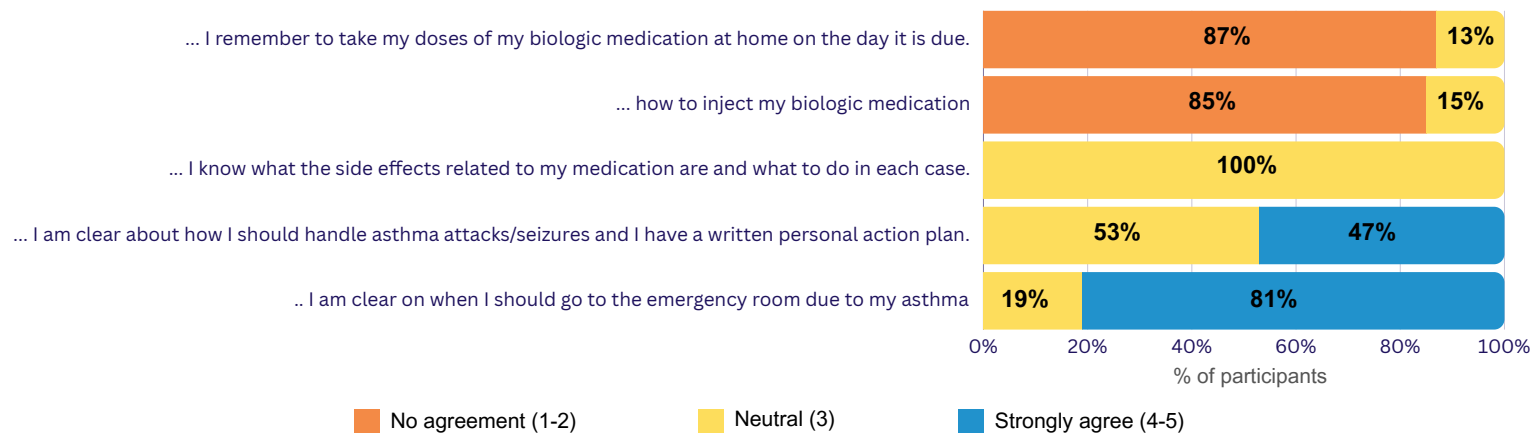

## HEALTHCARE PROFESSIONALS SAY...

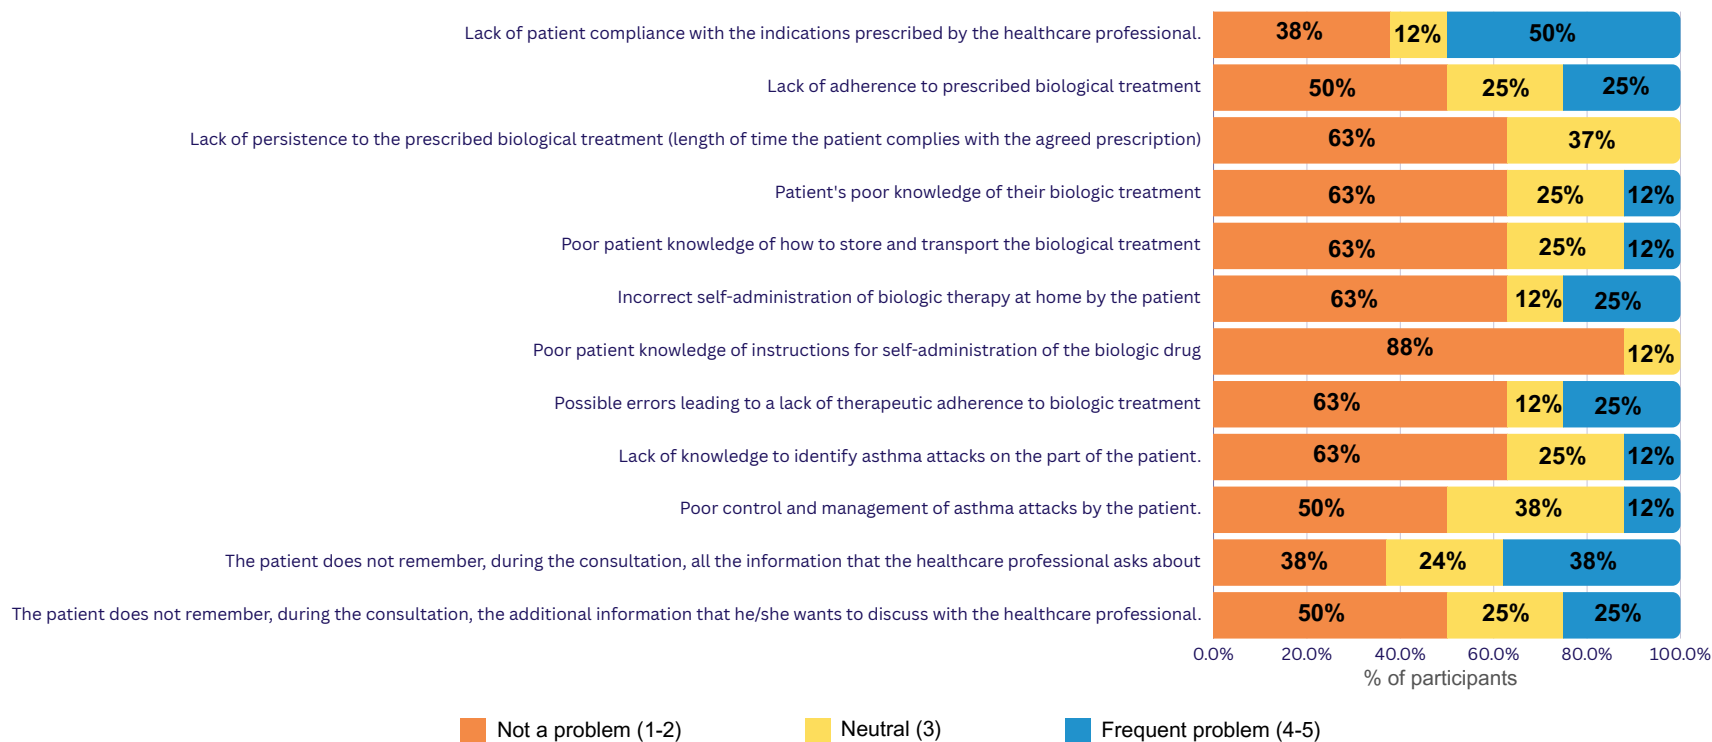

Supplement: mmc1.pdf [file mmc1.pdf]

# Supplementary figure 2

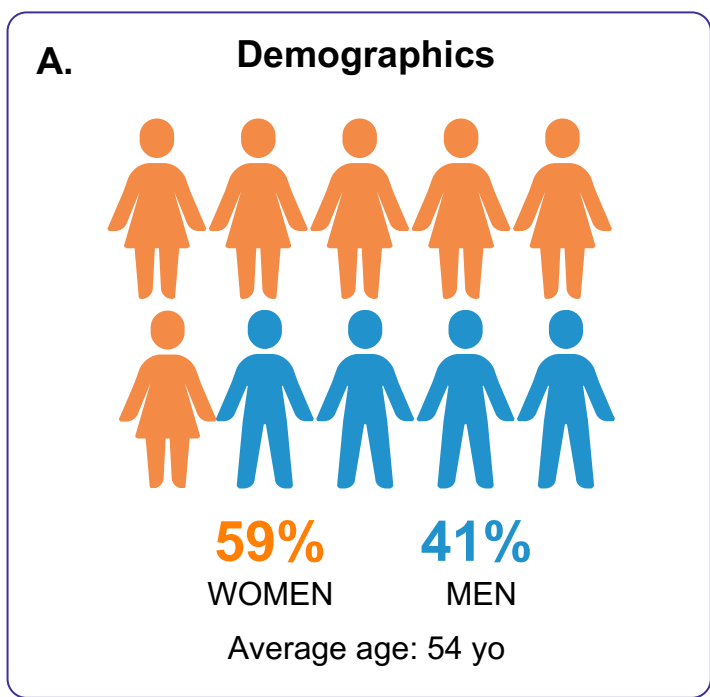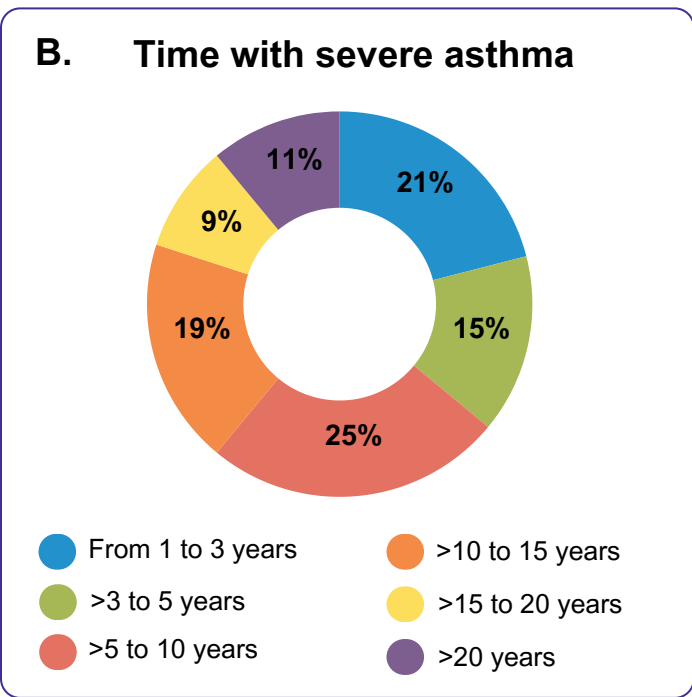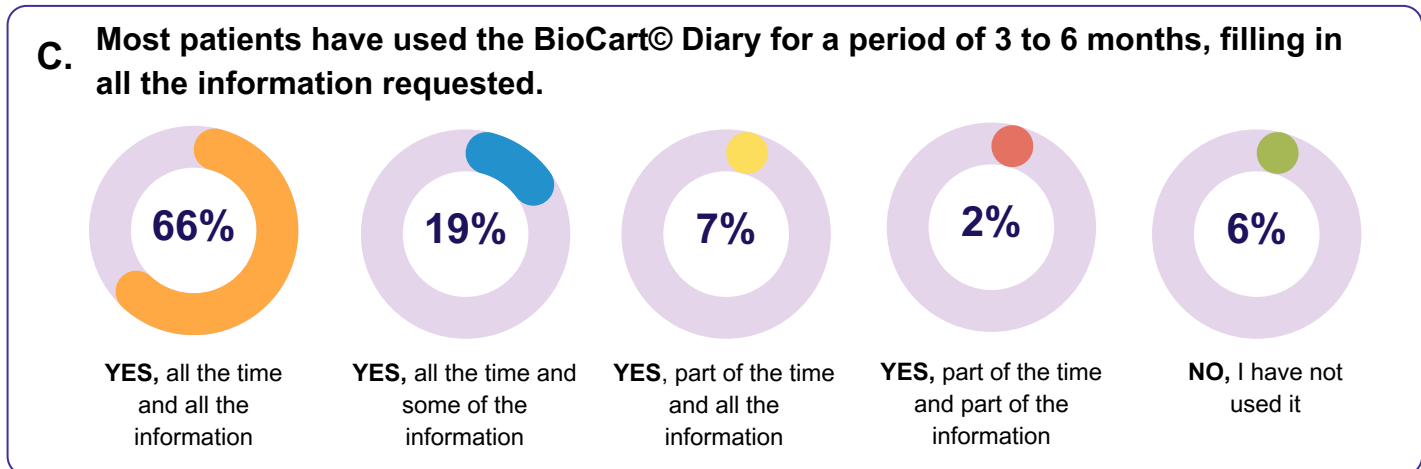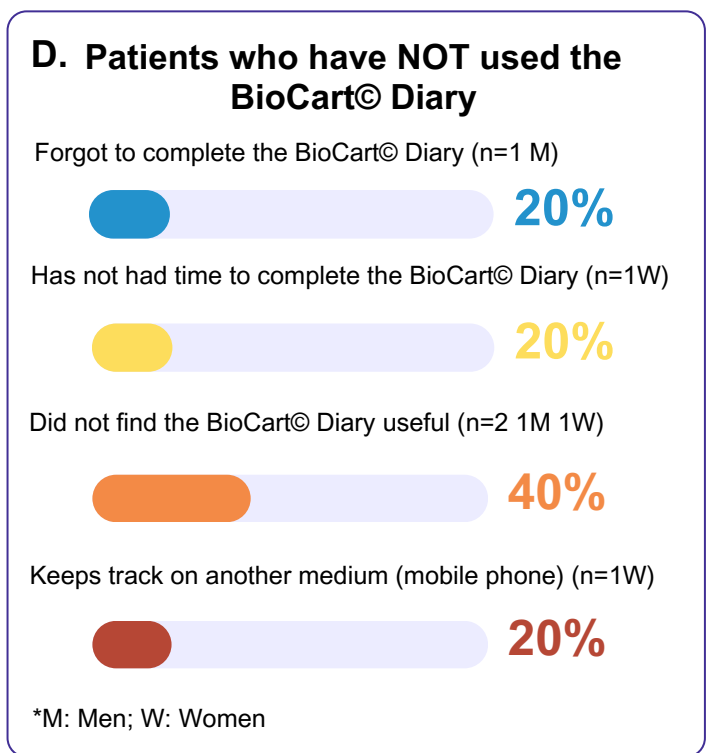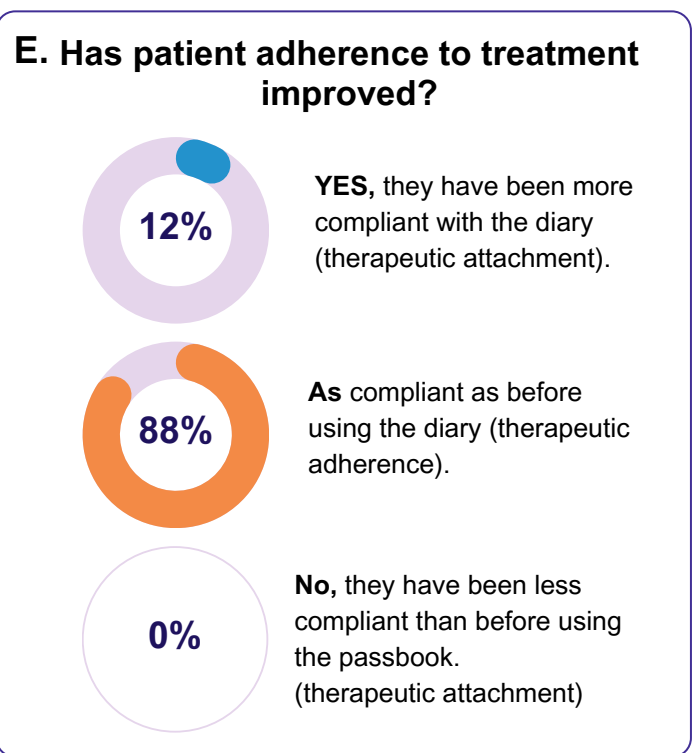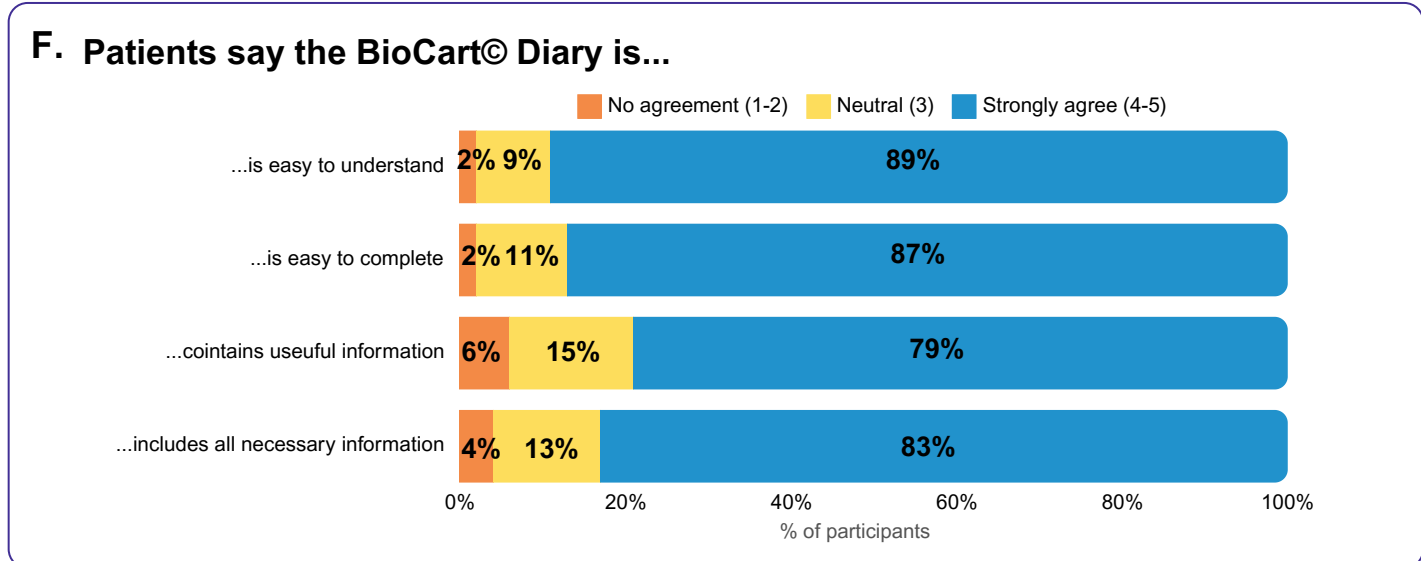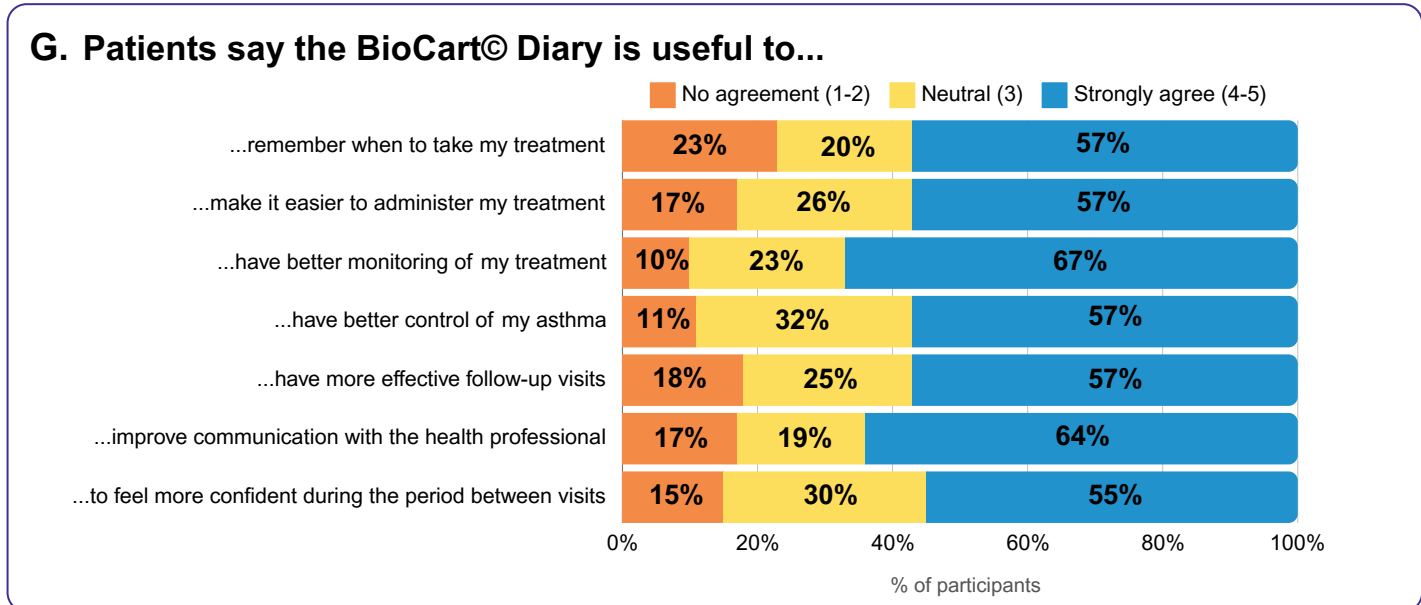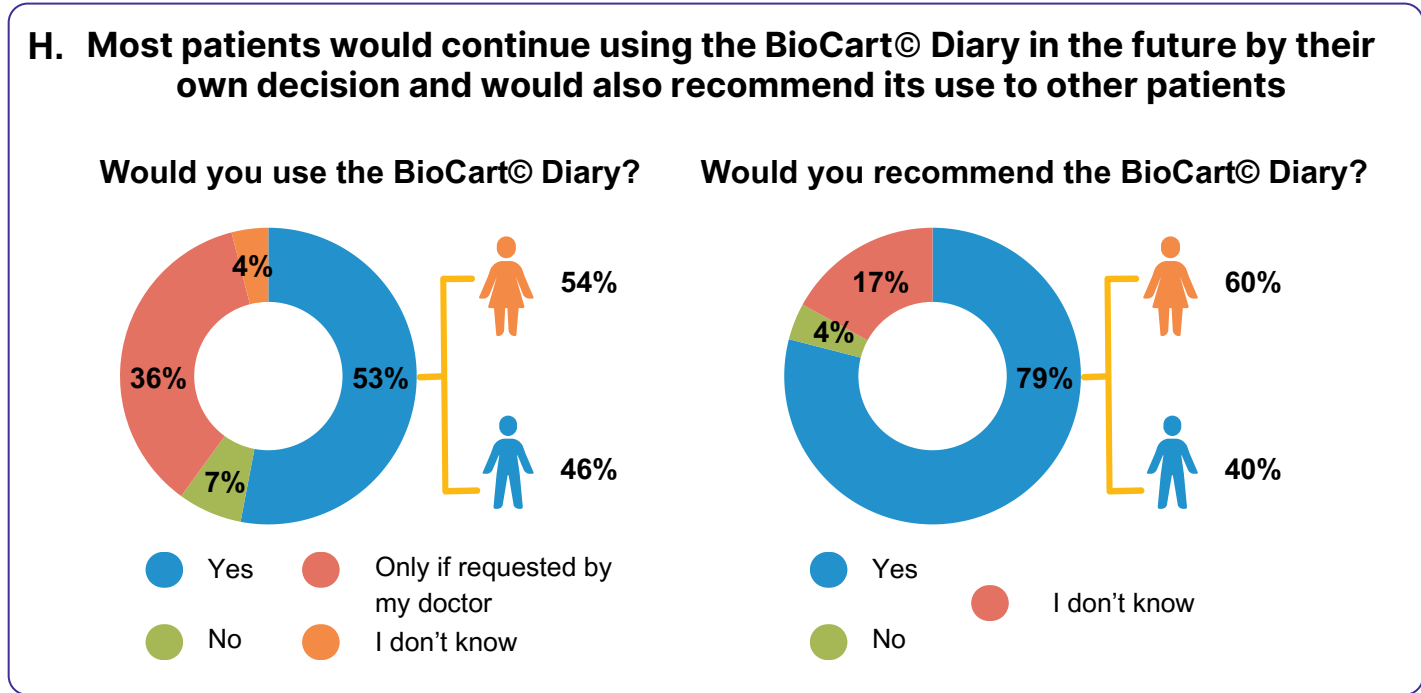

Supplement: mmc2.pdf [file mmc2.pdf]
